# Supplementary material for: Validation of boreal summer tropical-extratropical causal links in seasonal forecasts
Source: Copernicus journal article supplement (doi:10.5194/wcd-2022-48), 2022-08-24

## (a) SEAS5 time line

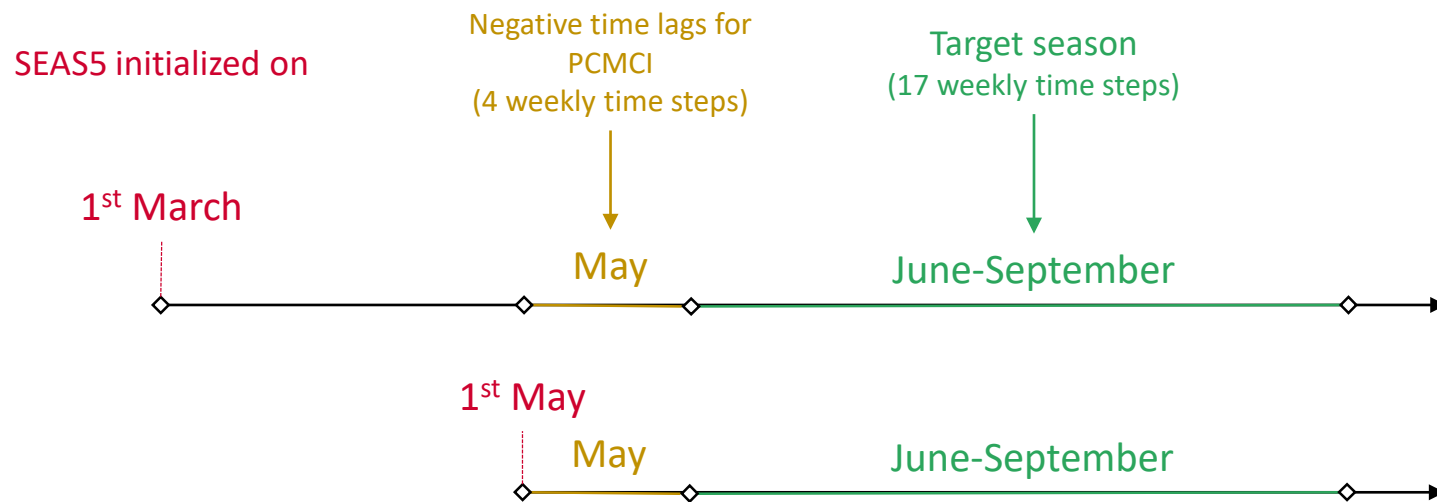

## (b) SEAS5 ensemble members

SEAS5 initialized on 1<sup>st</sup> March

1993

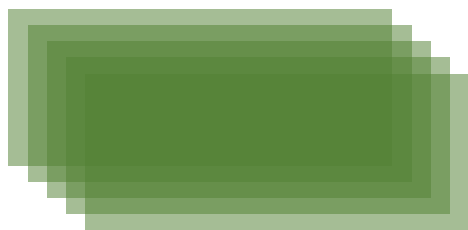

25 ensemble members for each year

Total:  
 $21 \times 24 \times 25 = 12.600$   
weekly time steps

SEAS5 initialized on 1<sup>st</sup> May

1993

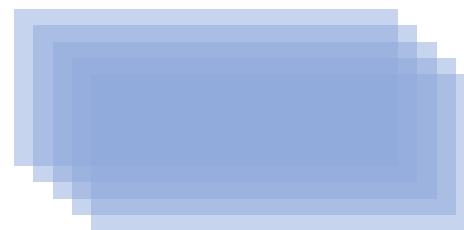

25 ensemble members for each year

Total:  
 $21 \times 24 \times 25 = 12.600$   
weekly time steps

(a) Causal Effect Network

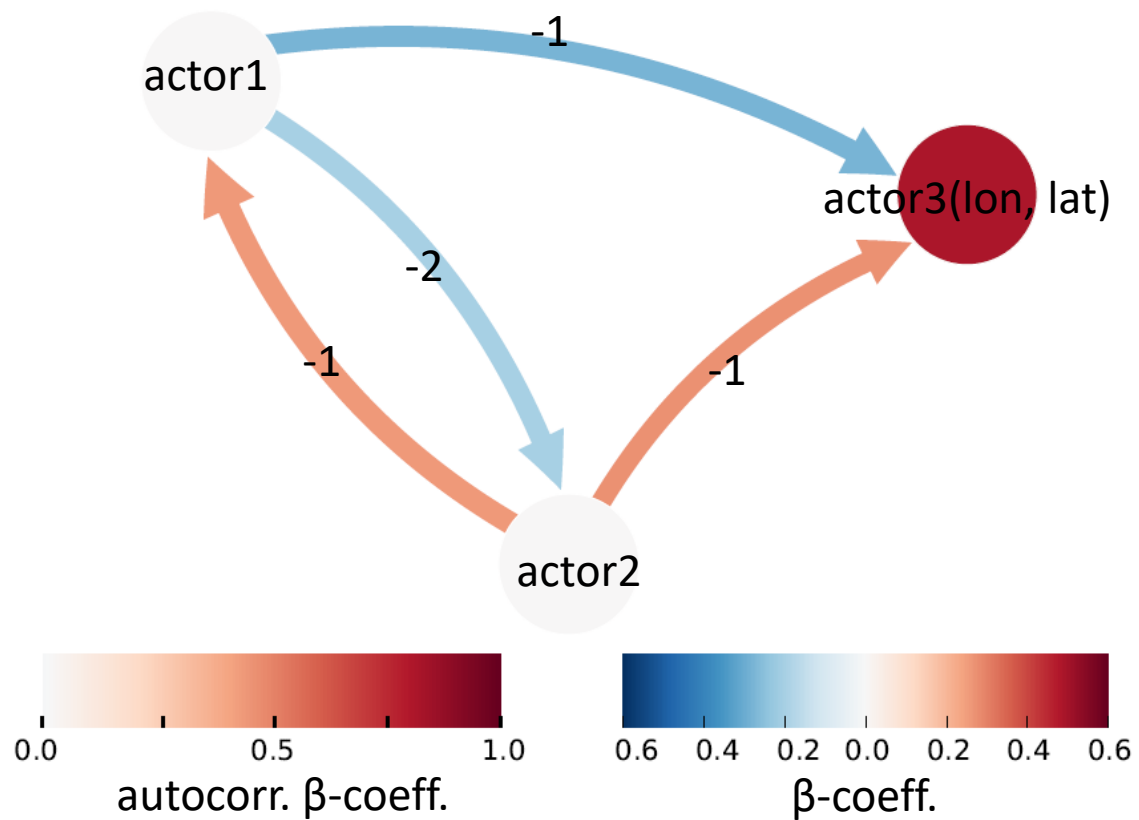

(b) Causal Map

actor1 <sub>$\tau=-1$</sub>   $\rightarrow$  actor3 <sub>$\tau=0$</sub>  (lat, lon) | all <sub>$\tau=-1,-2$</sub>

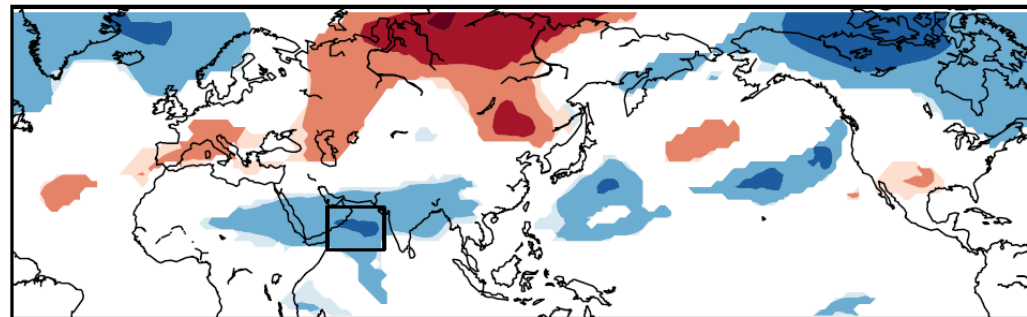

actor2 <sub>$\tau=-1$</sub>   $\rightarrow$  actor3 <sub>$\tau=0$</sub>  (lat, lon) | all <sub>$\tau=-1,-2$</sub>

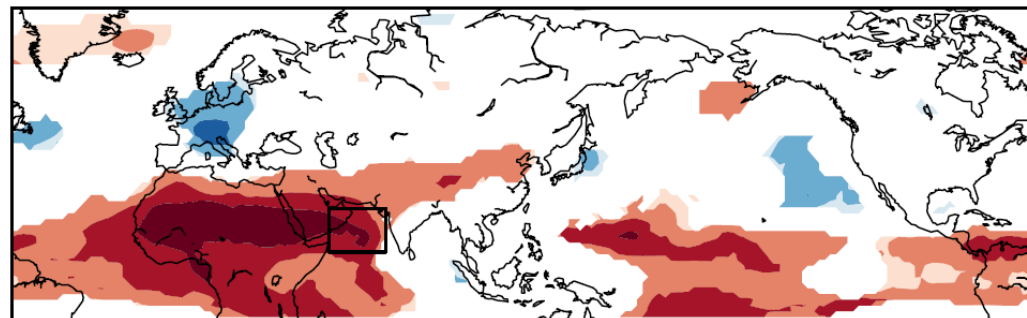

(a) ERA5 (1993-2016), MCA 1 - Z200 [m]

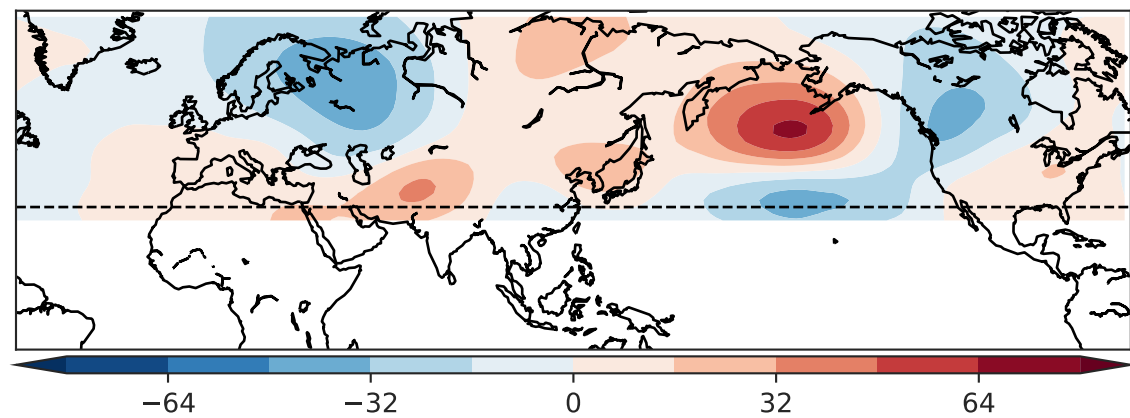

(b) CGT  $\Rightarrow$  Z200 | SAM, lag -1

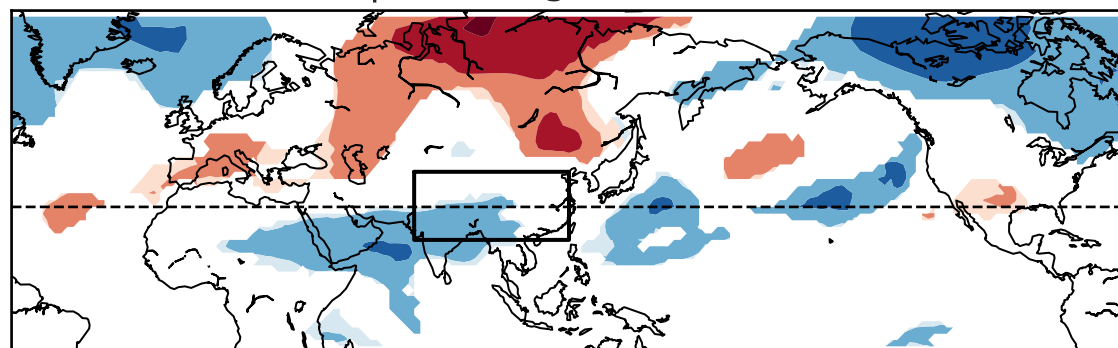

(c) CGT  $\Rightarrow$  OLR | SAM, lag -1

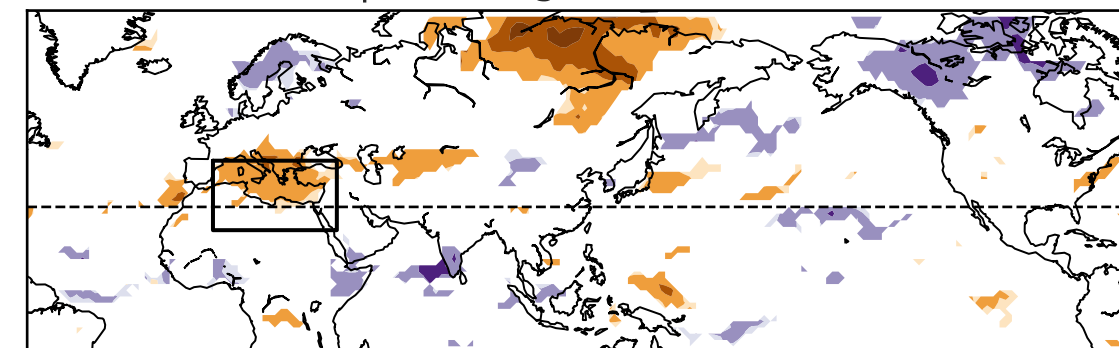

(d) ERA5 (1993-2016), MCA 1 - OLR [ $J \cdot m^{-2} \cdot 10^3$ ]

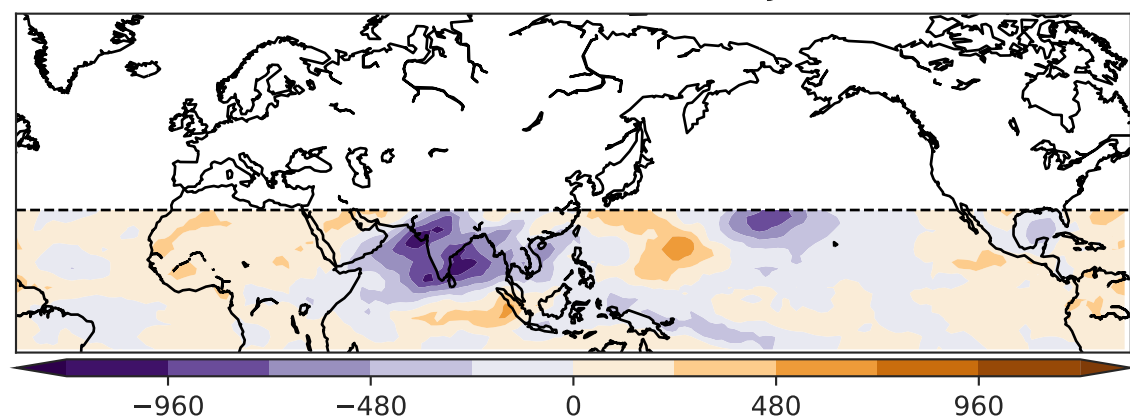

(e) SAM  $\Rightarrow$  Z200 | CGT, lag -1

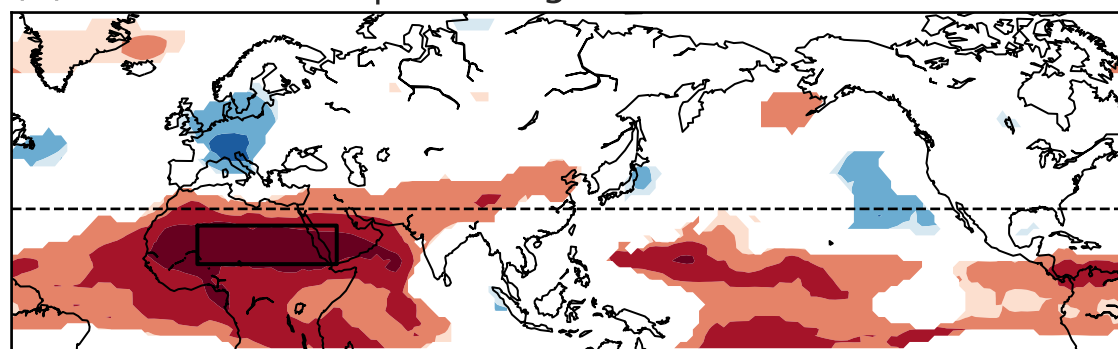

(f) SAM  $\Rightarrow$  OLR | CGT, lag -1

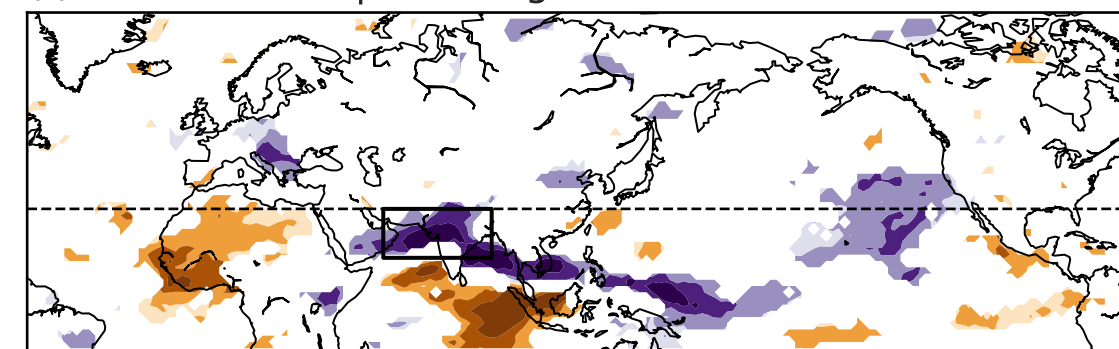

(g) ERA5 (1993-2016), MCA 2 - Z200 [m]

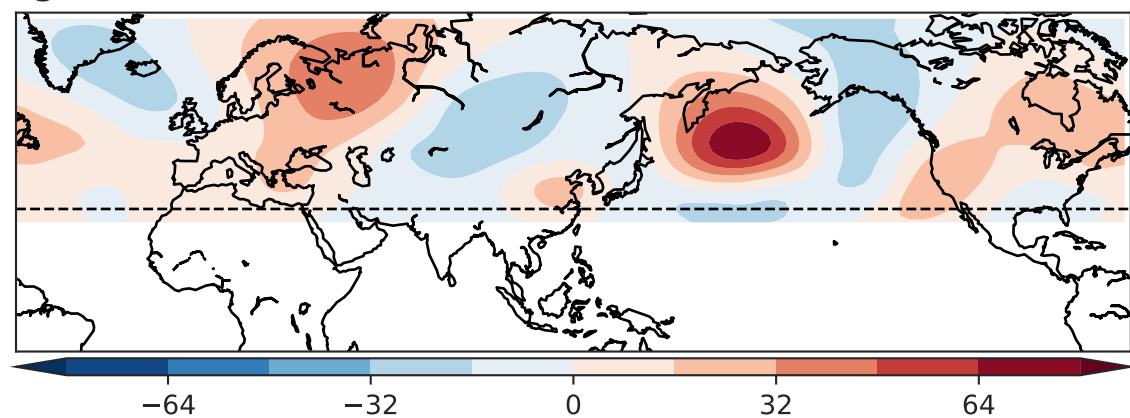

(h) NPH  $\Rightarrow$  Z200 | WNPSM, lag -1

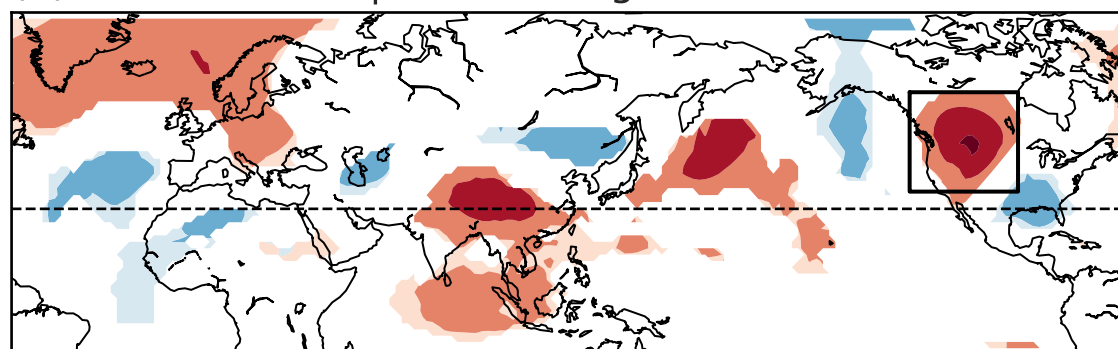

(i) NPH  $\Rightarrow$  OLR | WNPSM, lag -1

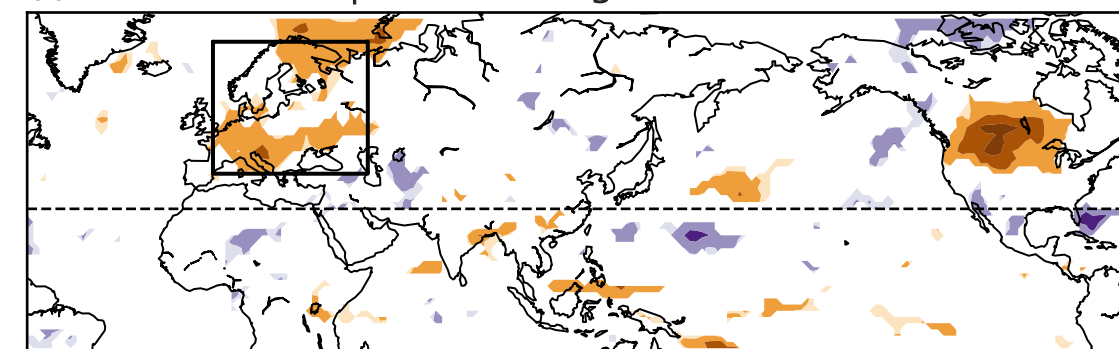

(j) ERA5 (1993-2016), MCA 2 - OLR [ $J \cdot m^{-2} \cdot 10^3$ ]

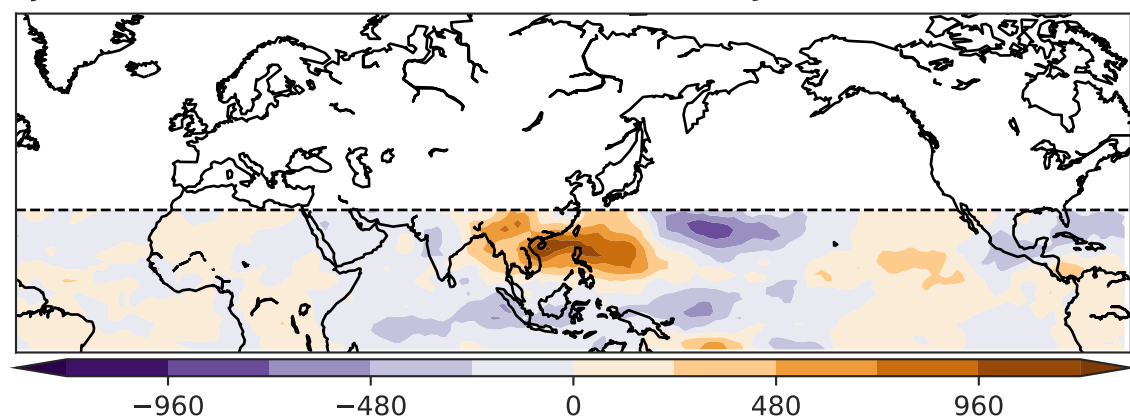

(k) WNPSM  $\Rightarrow$  Z200 | NPH, lag -1

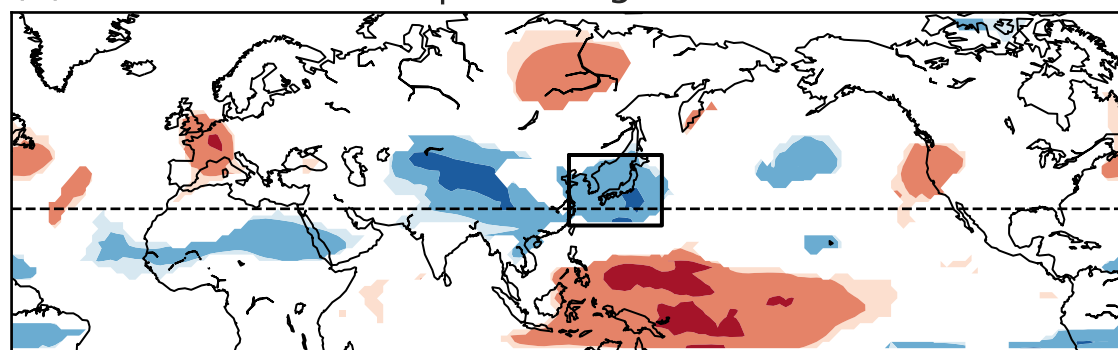

(l) WNPSM  $\Rightarrow$  OLR | NPH, lag -1

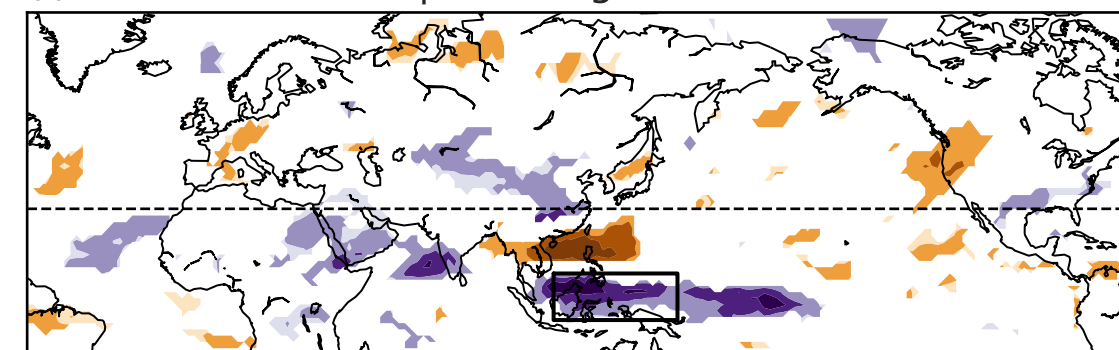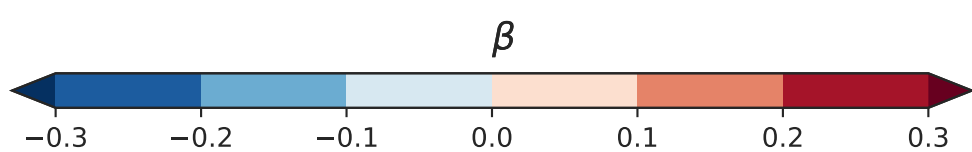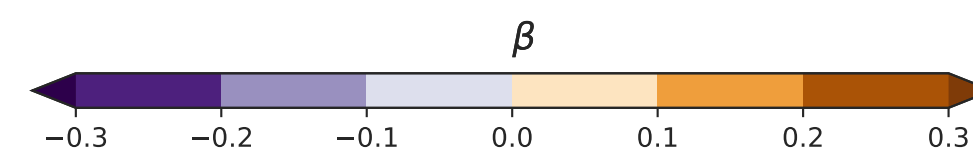



(a) SEAS5 - dotproduct of ERA5 MCA1 - Z200 [m]

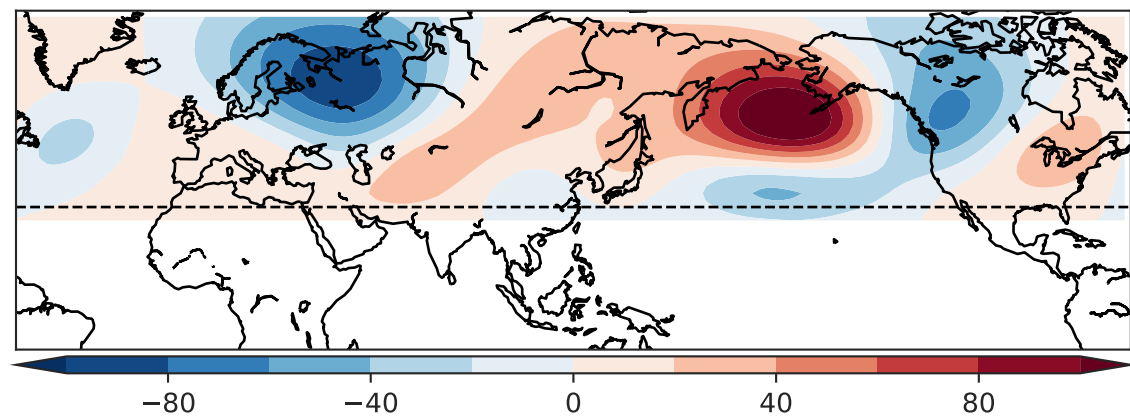

(b) CGT  $\Rightarrow$  Z200 | SAM, lag -1

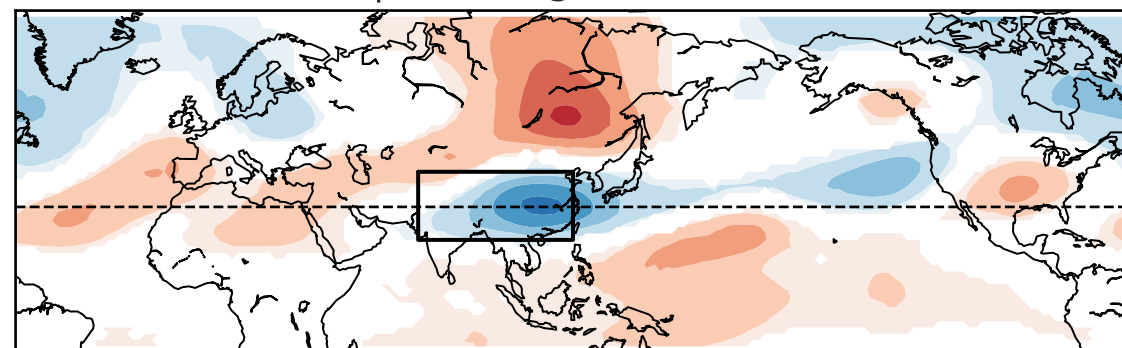

(c) CGT  $\Rightarrow$  OLR | SAM, lag -1

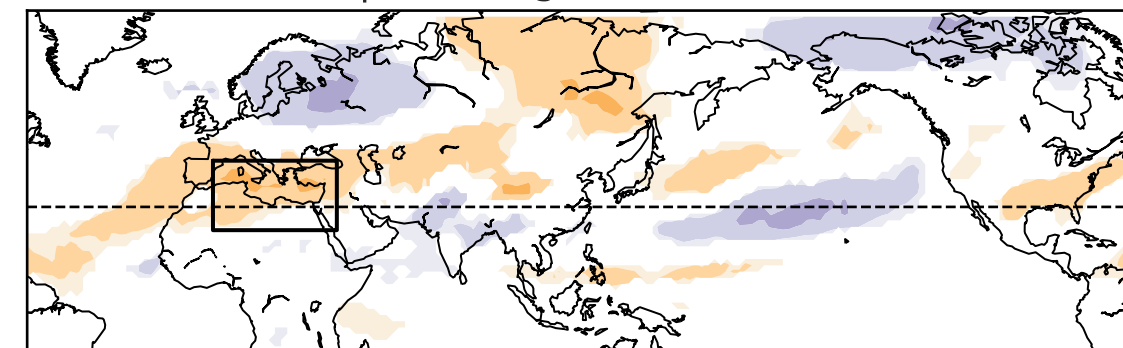

(d) SEAS5 - dotproduct of ERA5 MCA1 - OLR [ $J \cdot m^{-2} \cdot 10^3$ ]

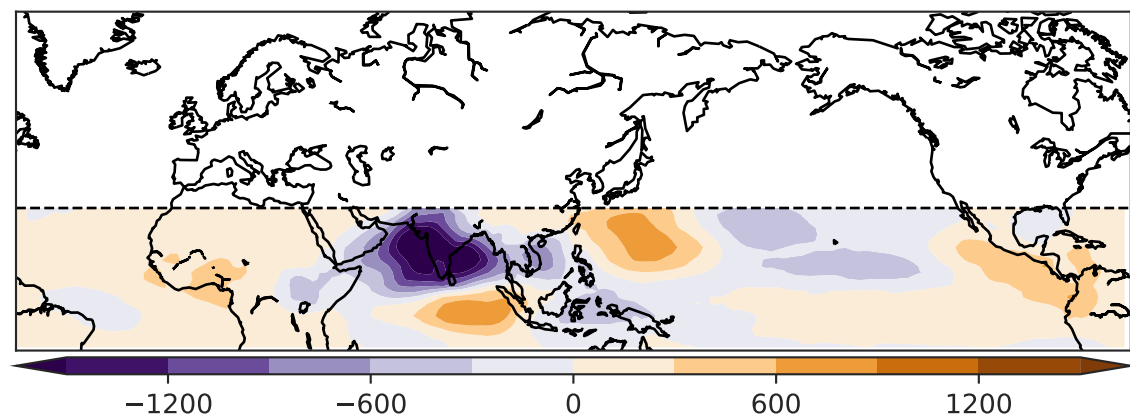

(e) SAM  $\Rightarrow$  Z200 | CGT, lag -1

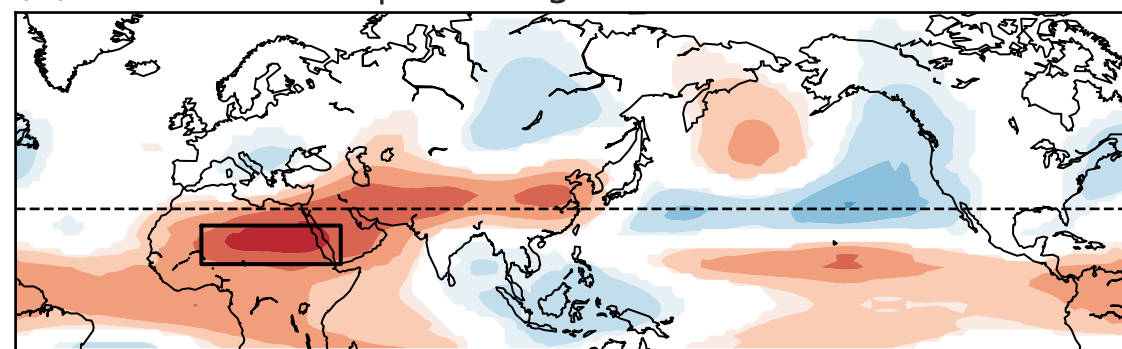

(f) SAM  $\Rightarrow$  OLR | CGT, lag -1

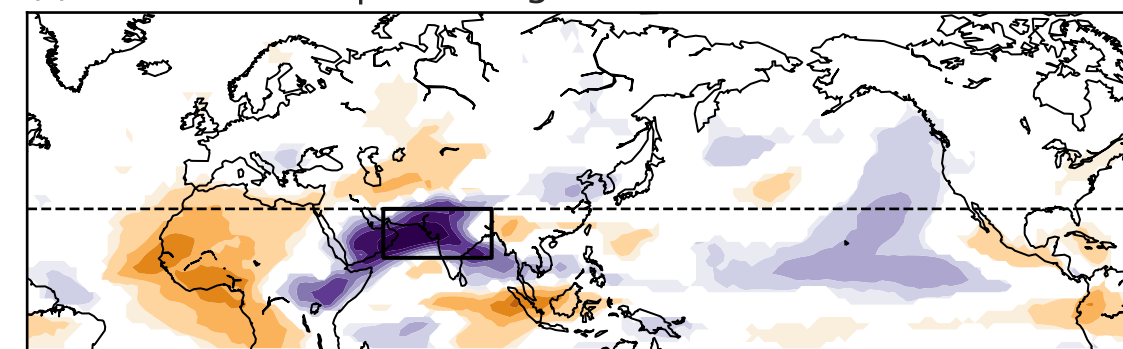

(g) SEAS5 - dotproduct of ERA5 MCA2 - Z200 [m]

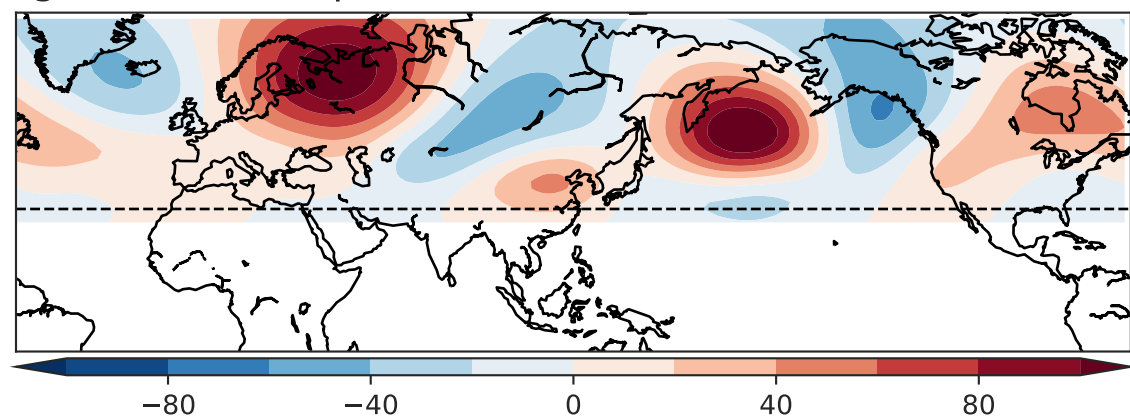

(h) NPH  $\Rightarrow$  Z200 | WNPSM, lag -1

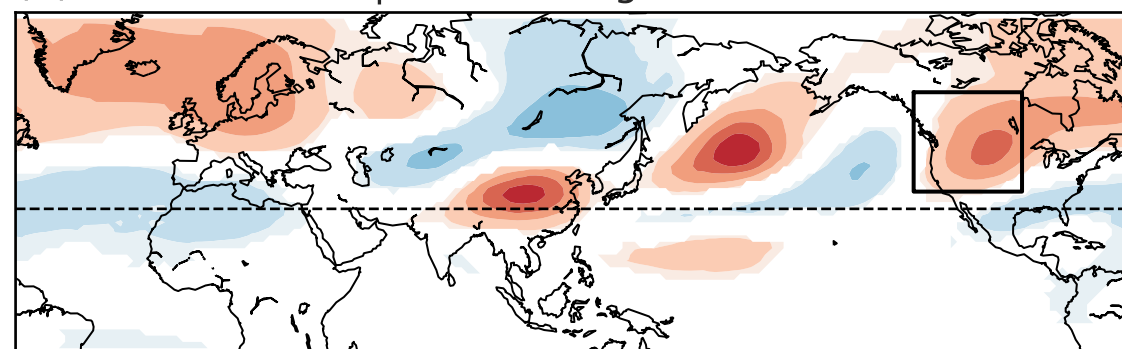

(i) NPH  $\Rightarrow$  OLR | WNPSM, lag -1

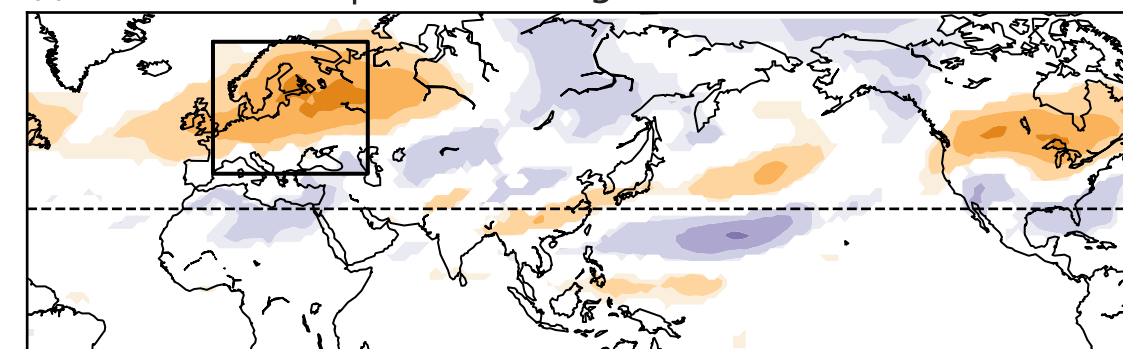

(j) SEAS5 - dotproduct of ERA5 MCA2 - OLR [ $J \cdot m^{-2} \cdot 10^3$ ]

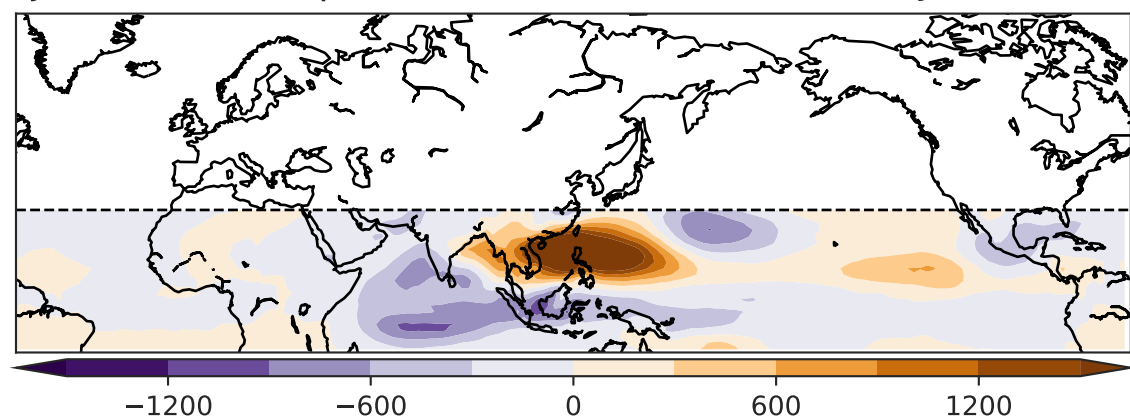

(k) WNPSM  $\Rightarrow$  Z200 | NPH, lag -1

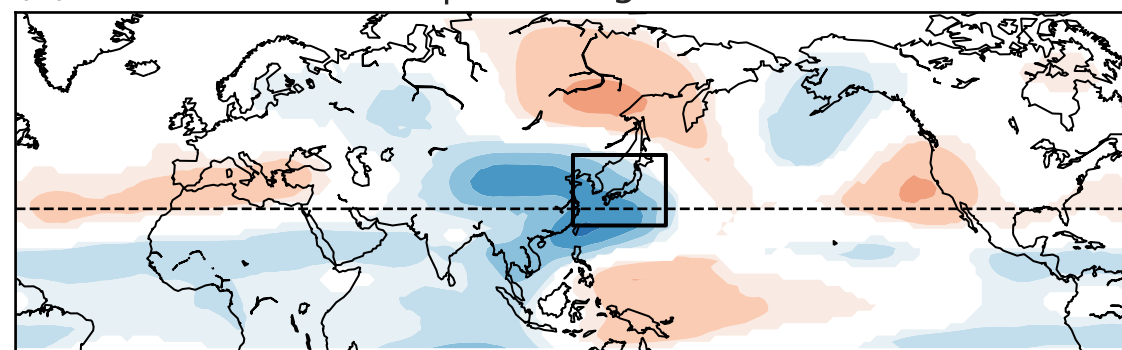

(l) WNPSM  $\Rightarrow$  OLR | NPH, lag -1

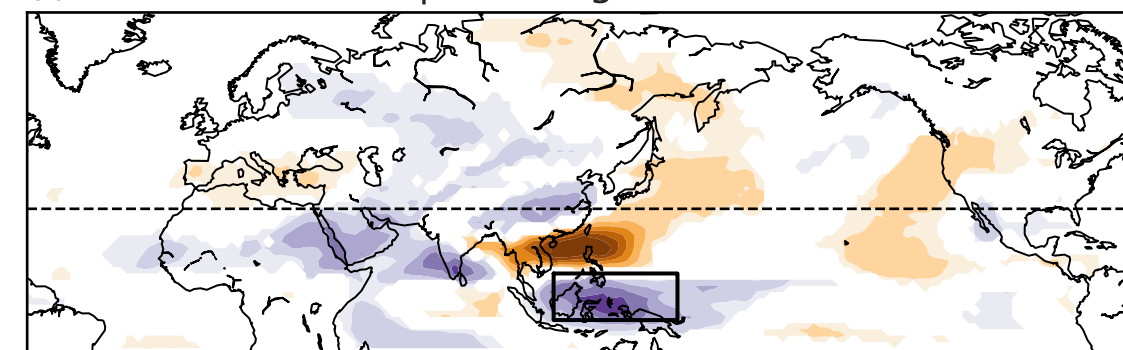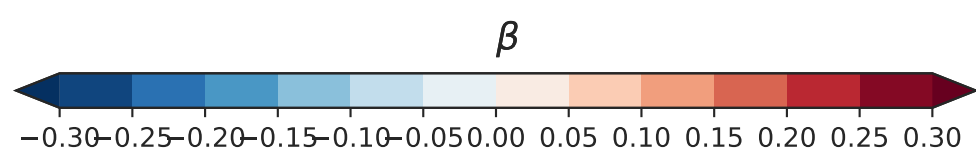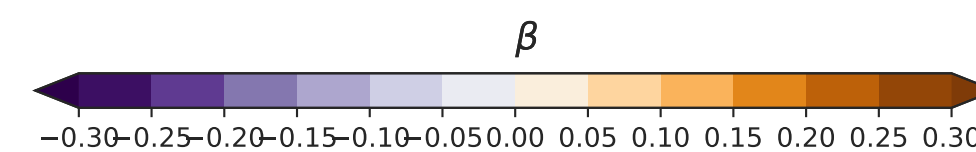

# ERA5 - SEAS5 (MCA-ERA5), 1993-2016

(a) CGT  $\Rightarrow$  Z200 | SAM; mean: 0.39, std: 0.34

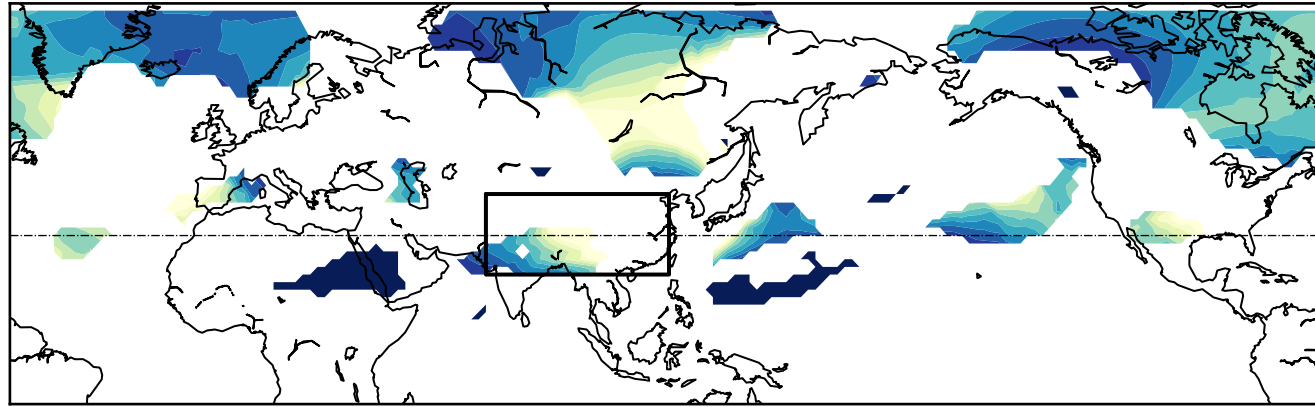

(b) CGT  $\Rightarrow$  Z200 | SAM - Histogram

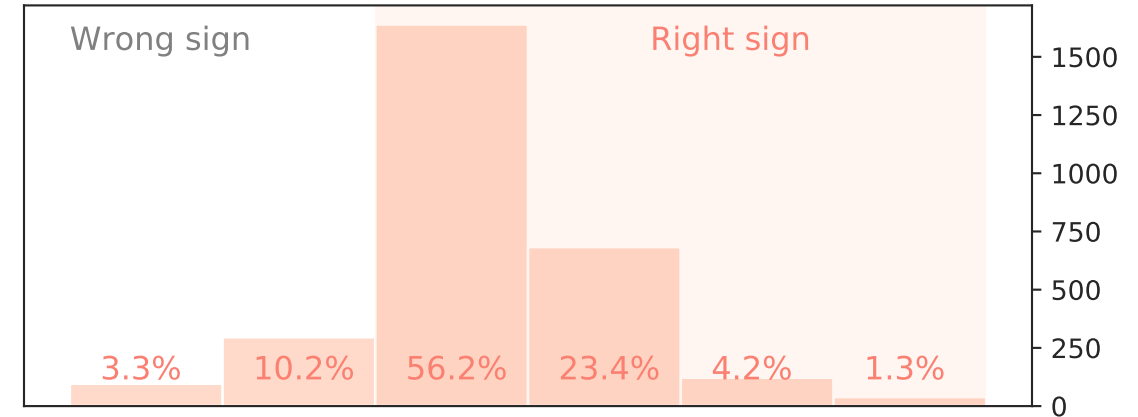

(c) SAM  $\Rightarrow$  Z200 | CGT; mean: 0.54, std: 0.28

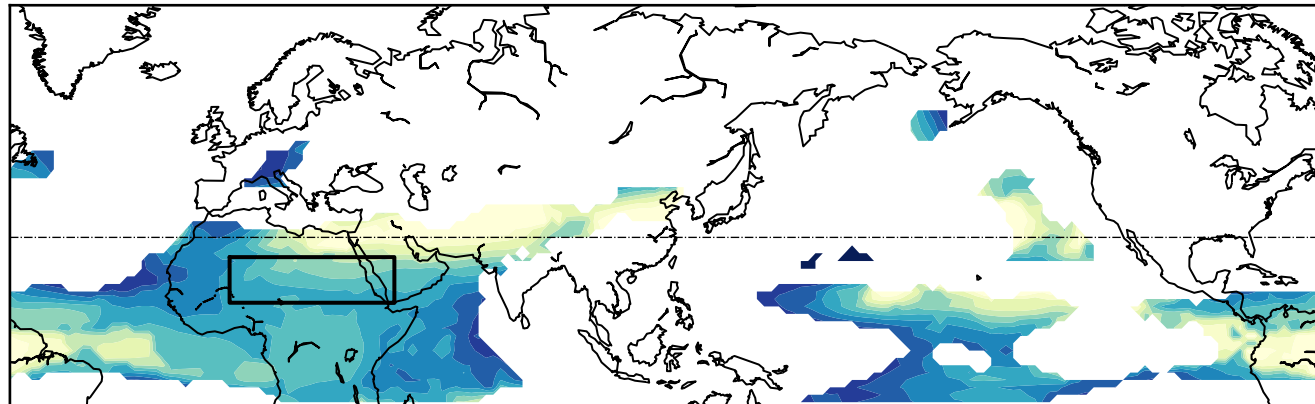

(d) SAM  $\Rightarrow$  Z200 | CGT - Histogram

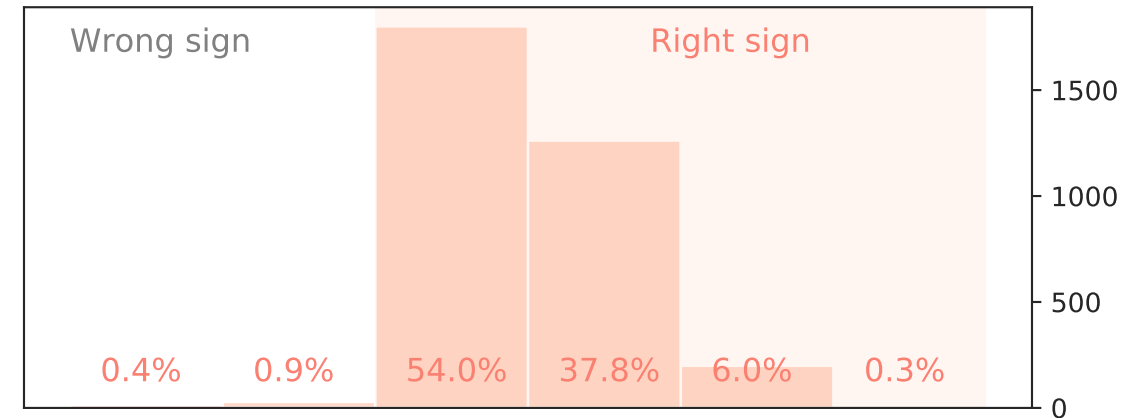

(e) CGT  $\Rightarrow$  OLR | SAM; mean: 0.44, std: 0.28

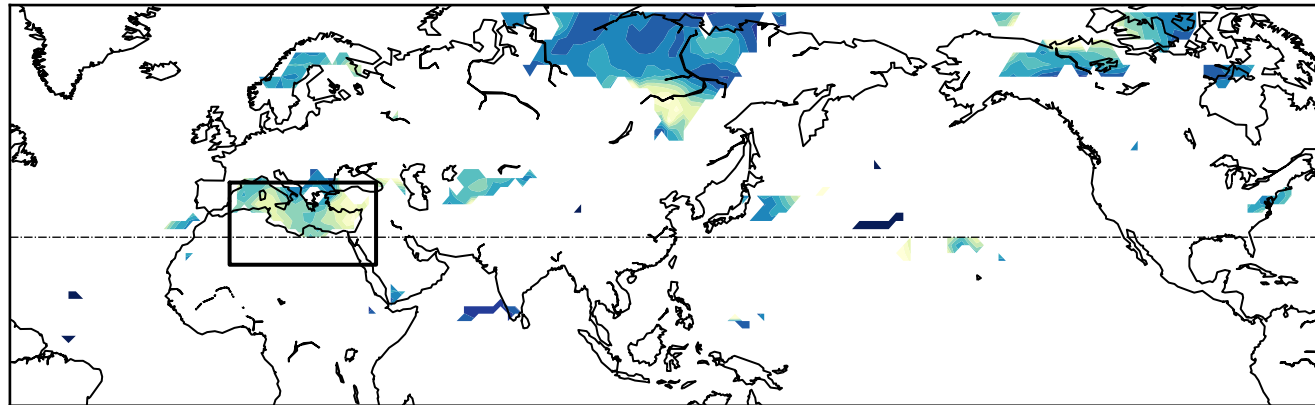

(f) CGT  $\Rightarrow$  OLR | SAM - Histogram

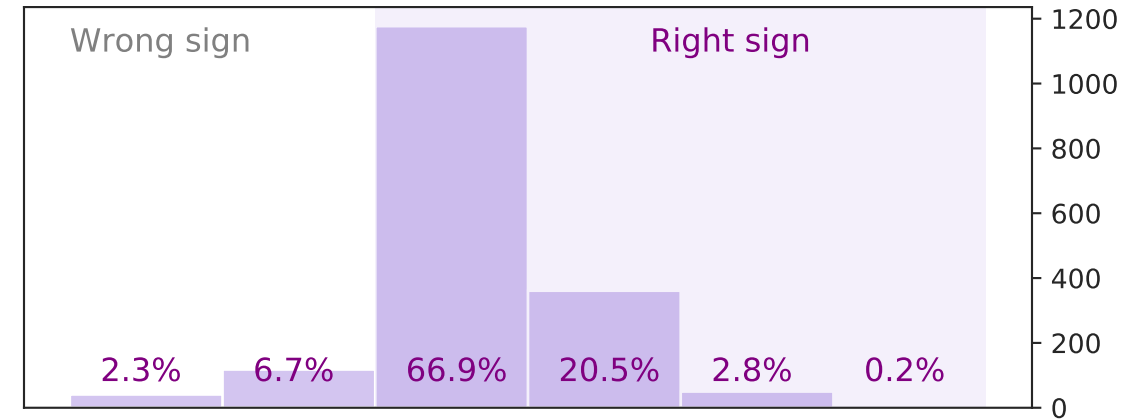

(g) SAM  $\Rightarrow$  OLR | CGT; mean: 0.71, std: 0.4

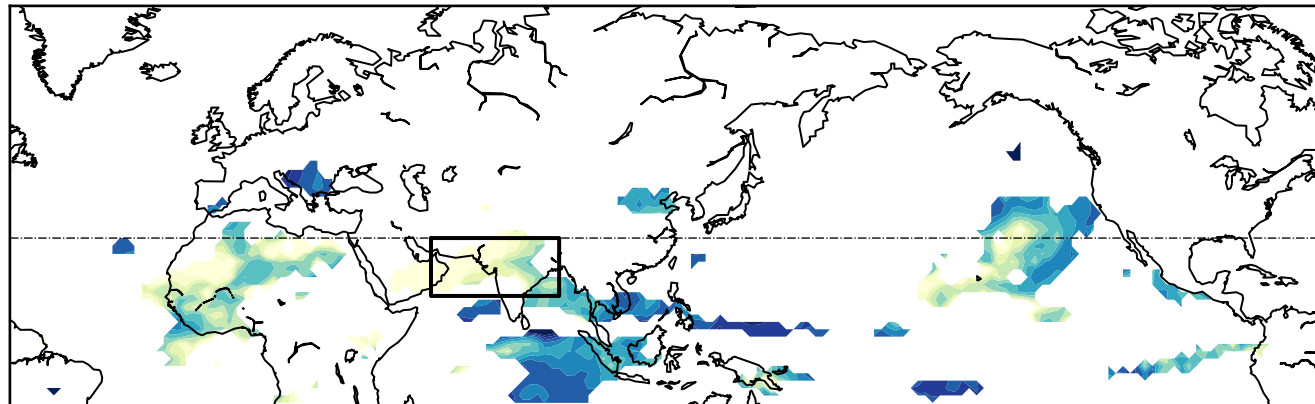

(h) SAM  $\Rightarrow$  OLR | CGT - Histogram

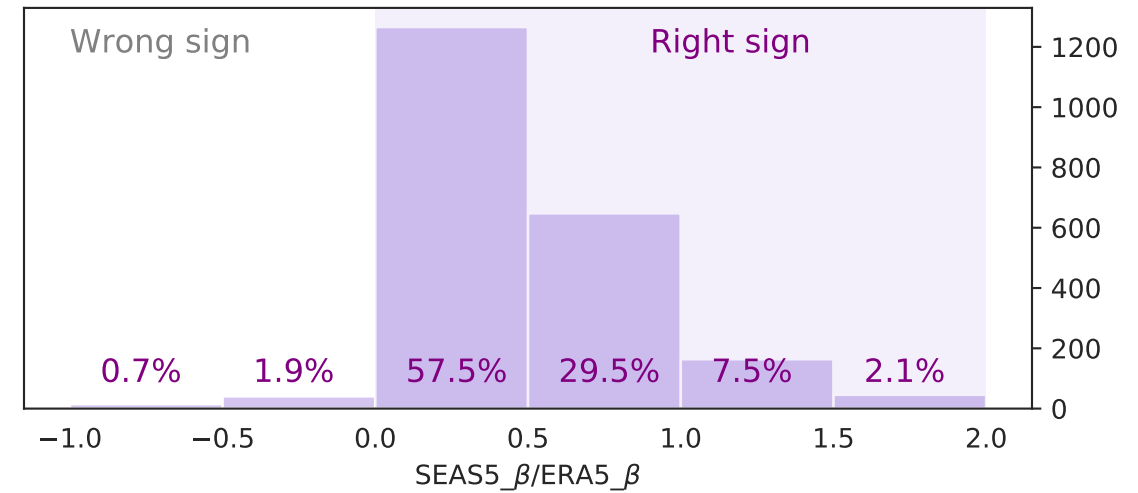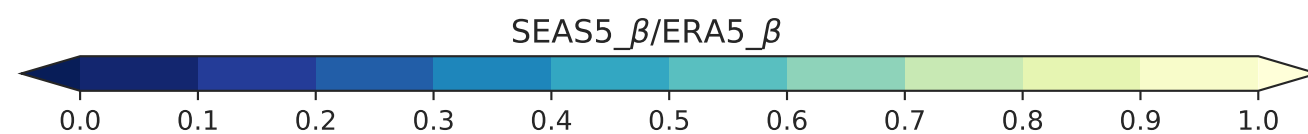



# ERA5 - SEAS5 (MCA-ERA5), 1993-2016

(a) NPH  $\Rightarrow$  Z200 | WNPSM; mean: 0.69, std: 0.4

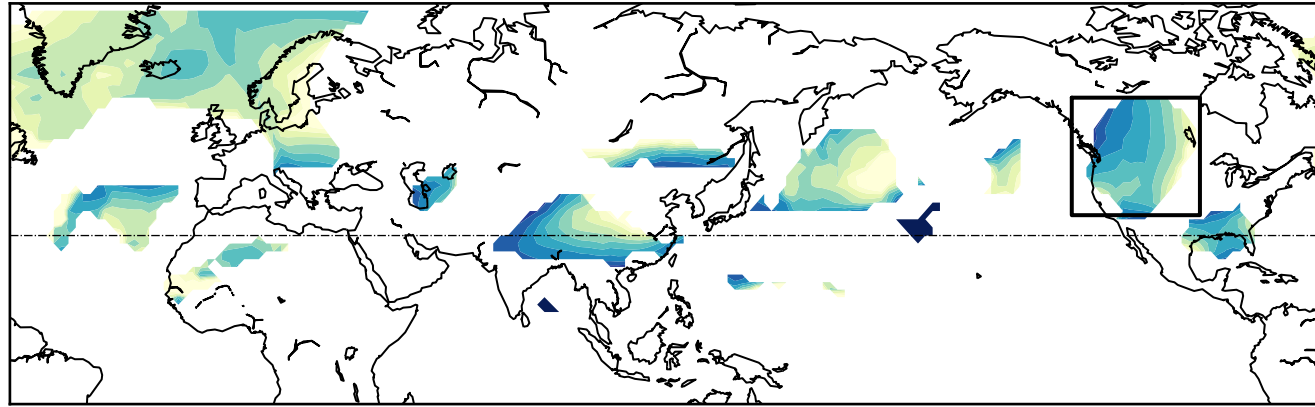

(b) NPH  $\Rightarrow$  Z200 | WNPSM - Histogram

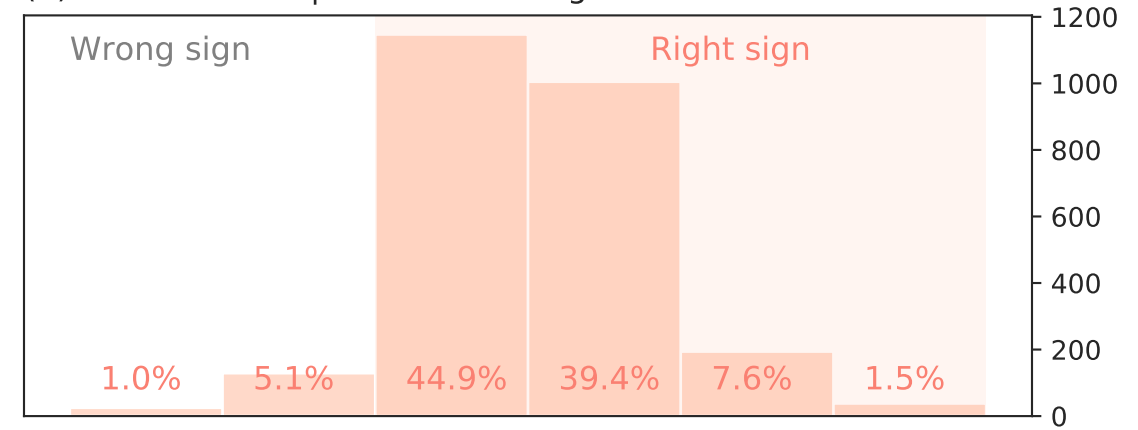

(c) WNPSM  $\Rightarrow$  Z200 | NPH; mean: 0.38, std: 0.56

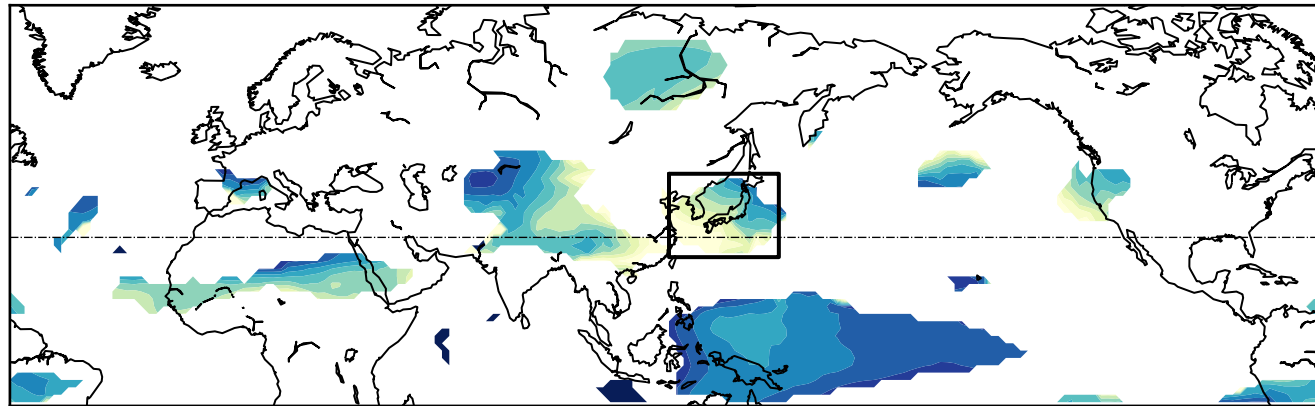

(d) WNPSM  $\Rightarrow$  Z200 | NPH - Histogram

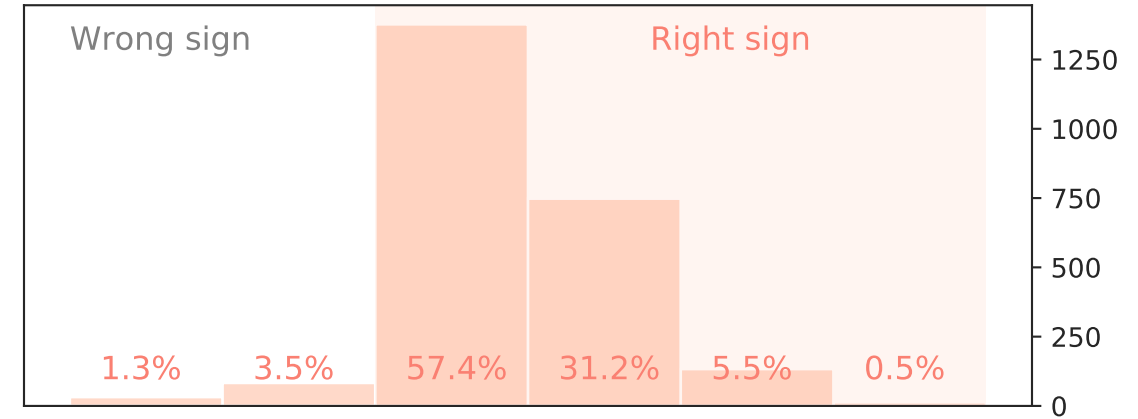

(e) NPH  $\Rightarrow$  OLR | WNPSM; mean: 0.74, std: 0.27

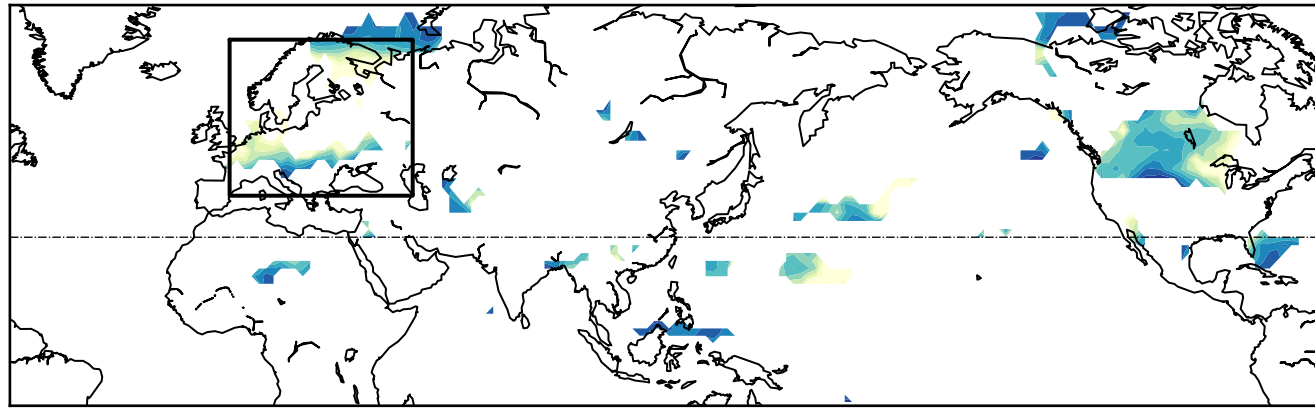

(f) NPH  $\Rightarrow$  OLR | WNPSM - Histogram

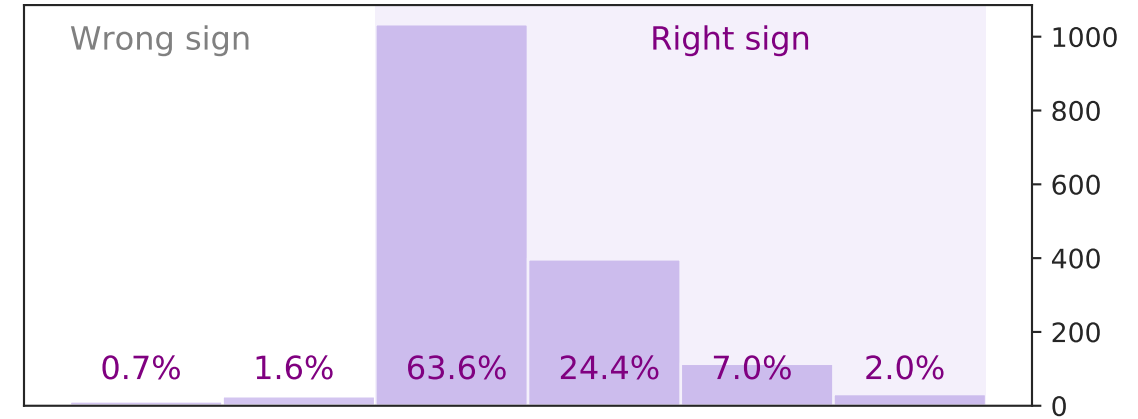

(g) WNPSM  $\Rightarrow$  OLR | NPH; mean: 0.66, std: 0.46

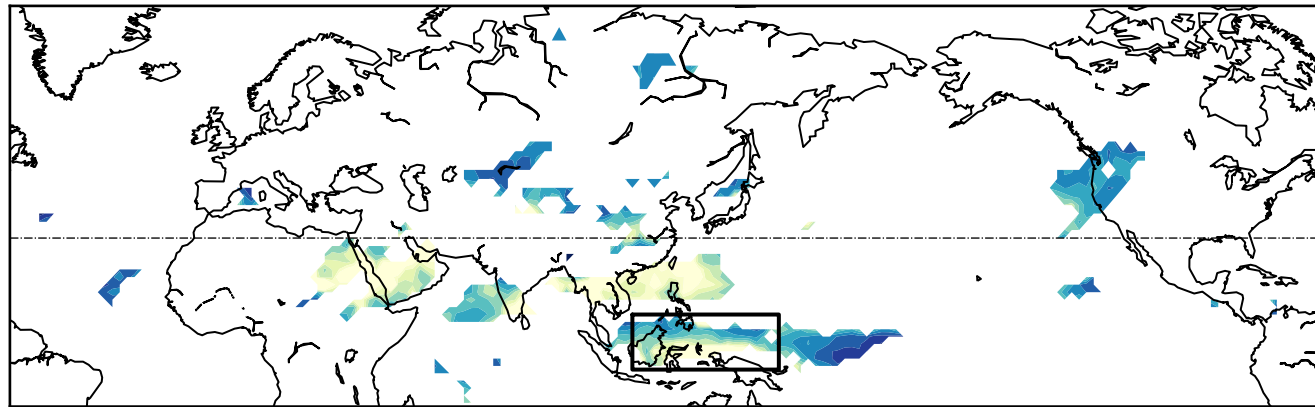

(h) WNPSM  $\Rightarrow$  OLR | NPH - Histogram

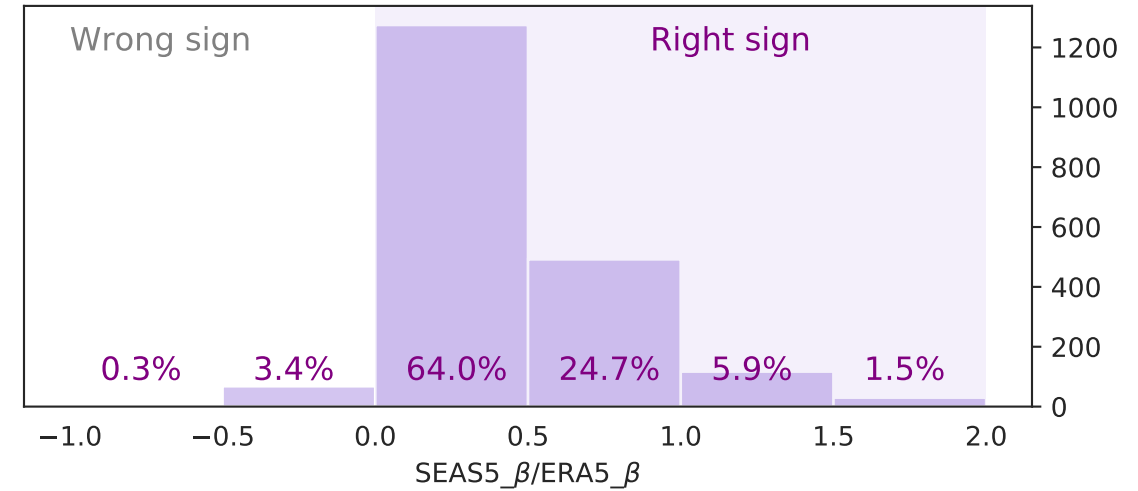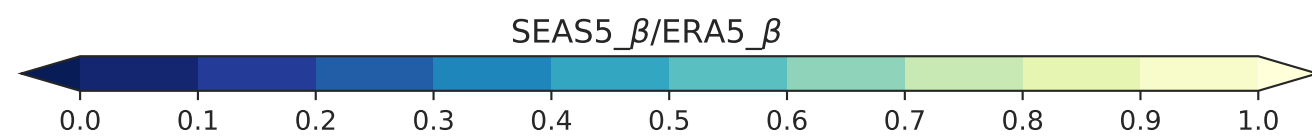

(a) SAM  $\Rightarrow$  Z200 | CGT - Sahel - mean  $\beta$

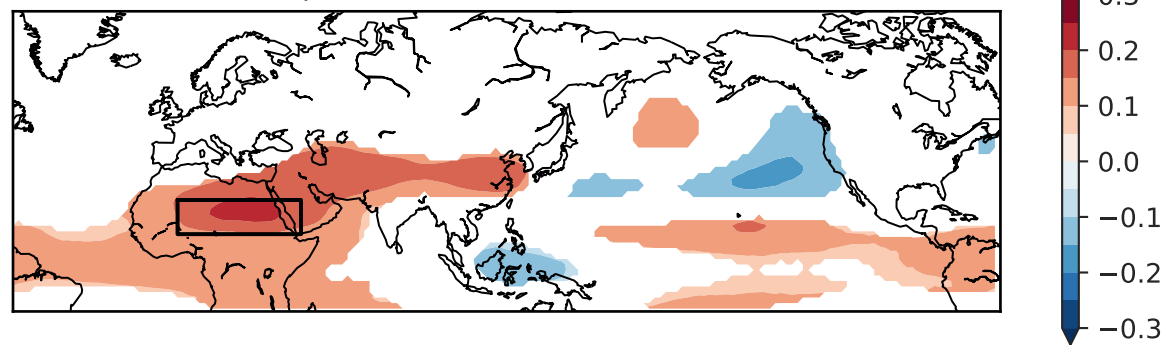

(c) CGT  $\Rightarrow$  Z200 | SAM - SE-Asia - mean  $\beta$

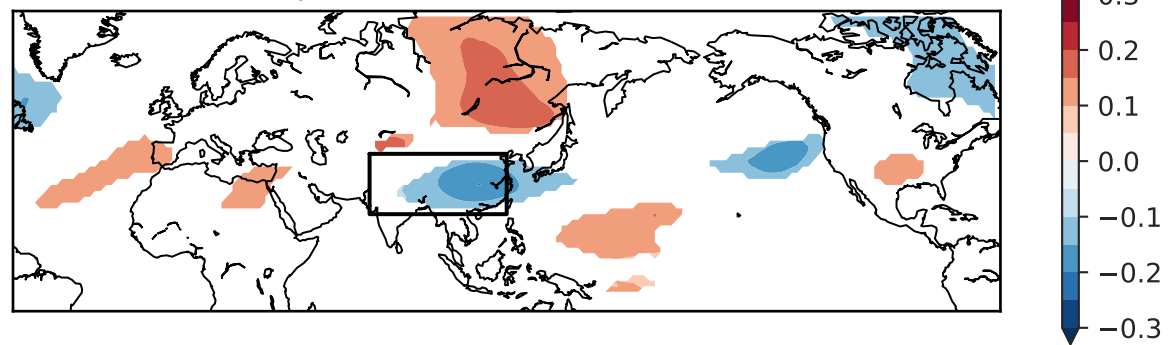

(e) SAM  $\Rightarrow$  OLR | CGT - India - mean  $\beta$

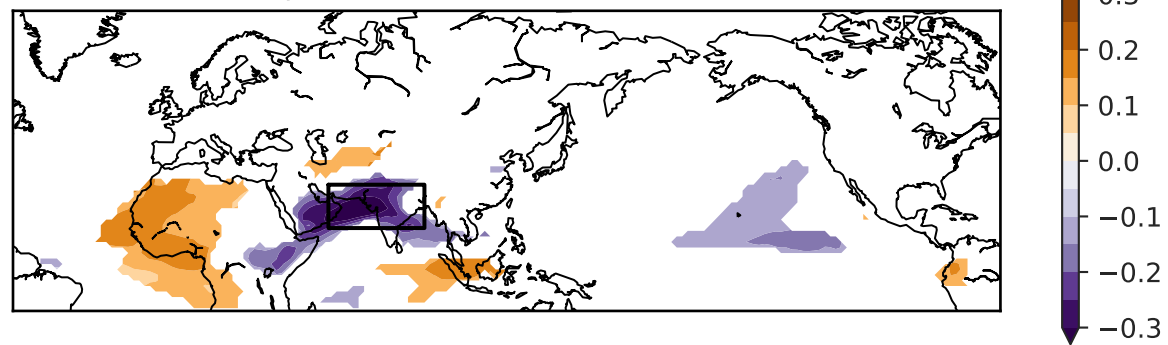

(g) CGT  $\Rightarrow$  OLR | SAM - Medit. - mean  $\beta$

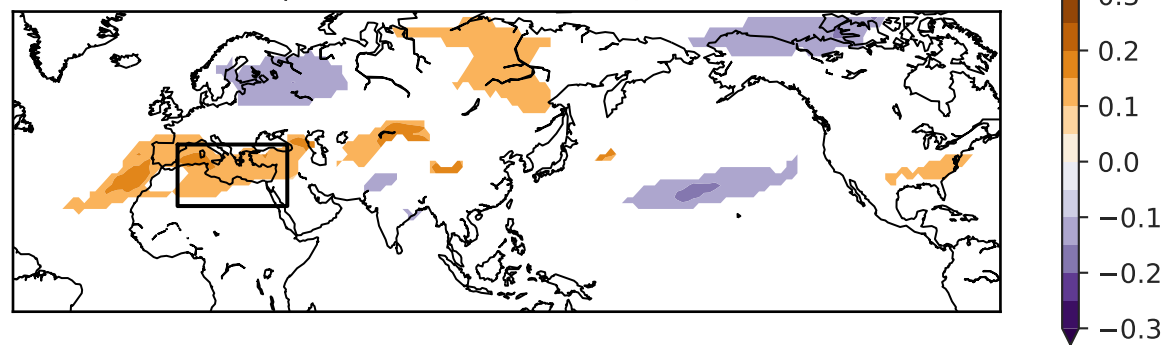

(b) Sahel Z200

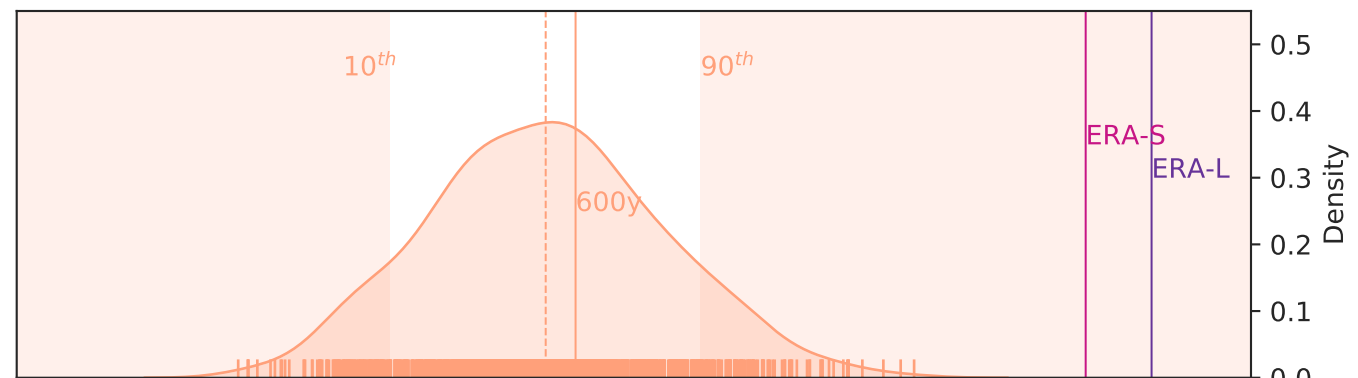

(d) SE-Asia Z200

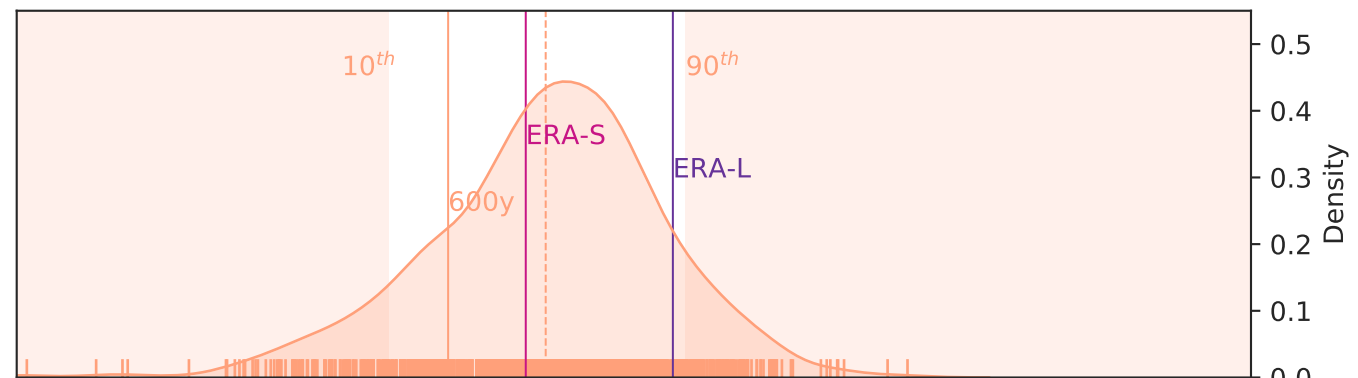

(f) India OLR

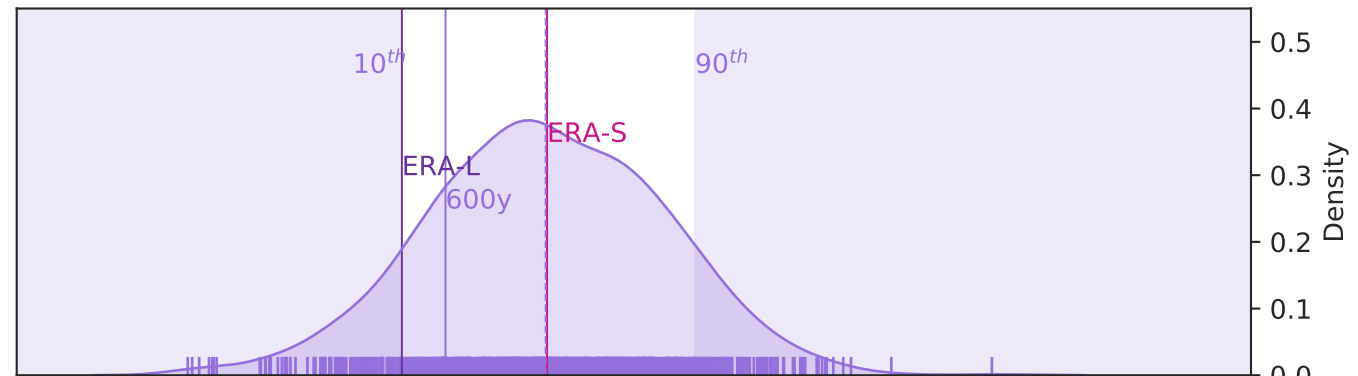

(h) Medit. OLR

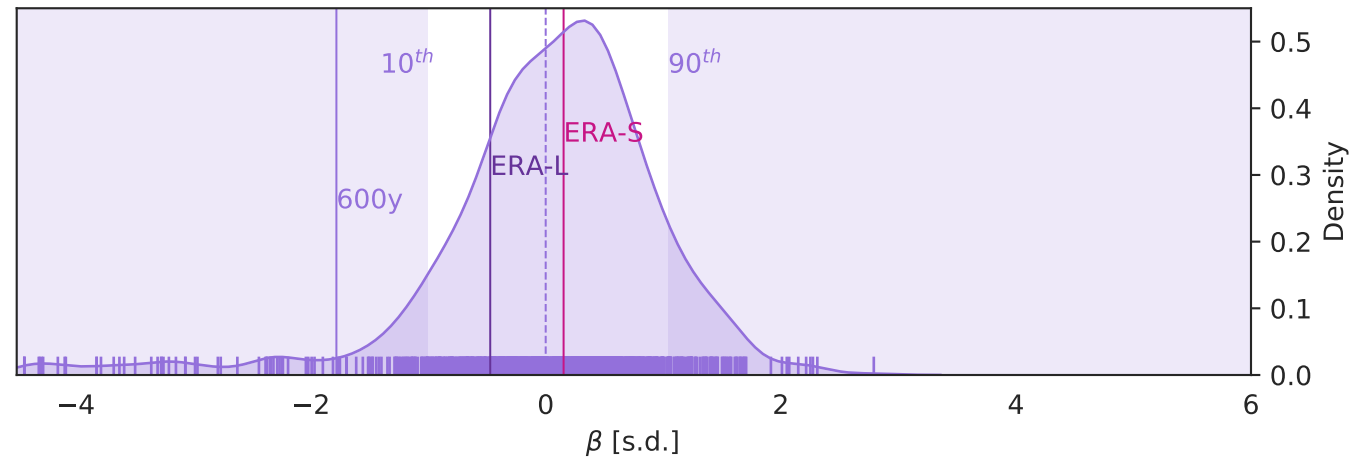

(a) WNPSM  $\Rightarrow$  Z200 | NPH - Japan - mean  $\beta$

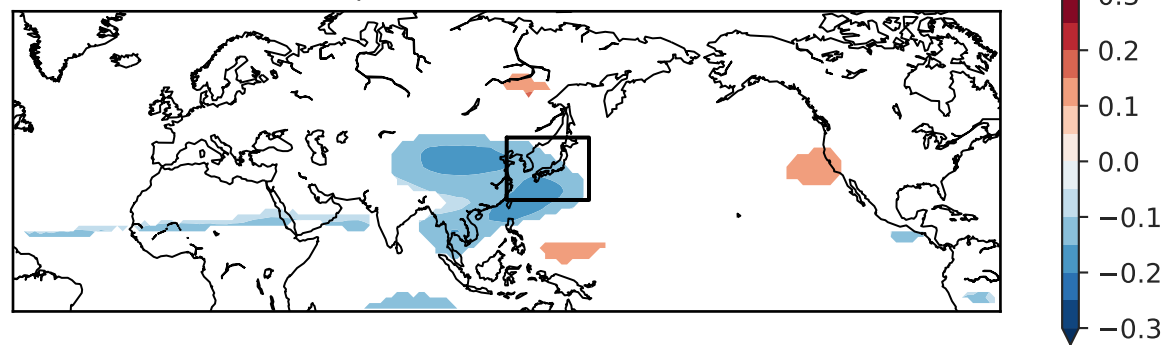

(c) NPH  $\Rightarrow$  Z200 | WNPSM - NW-US - mean  $\beta$

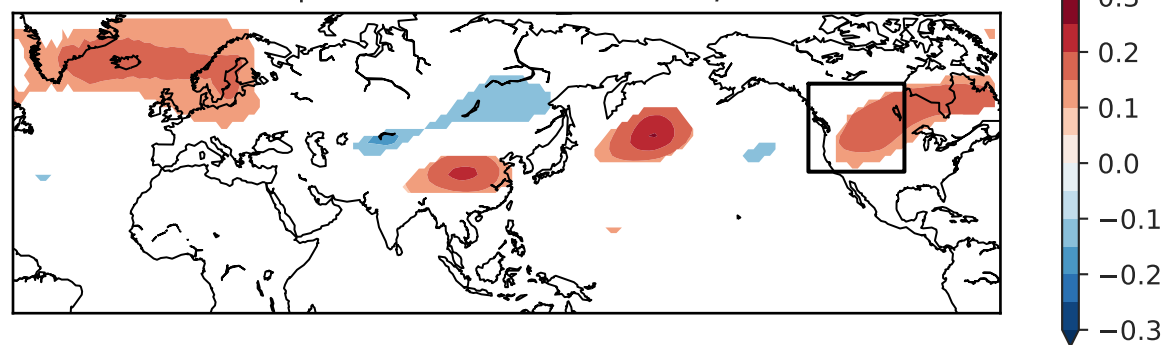

(e) WNPSM  $\Rightarrow$  OLR | NPH - M.Cont. - mean  $\beta$

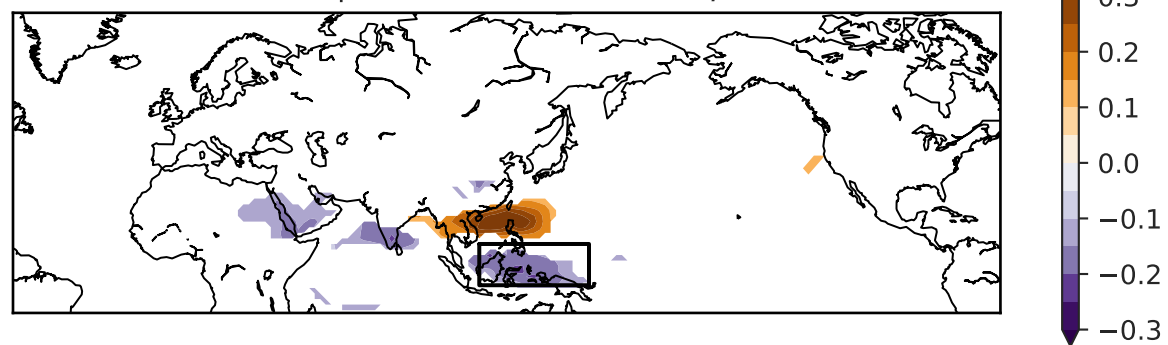

(g) NPH  $\Rightarrow$  OLR | WNPSM - CE-EU - mean  $\beta$

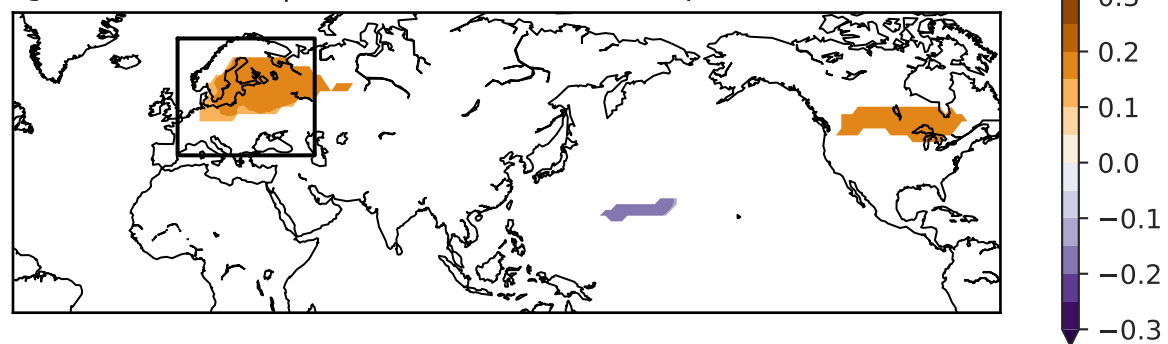

(b) Japan Z200

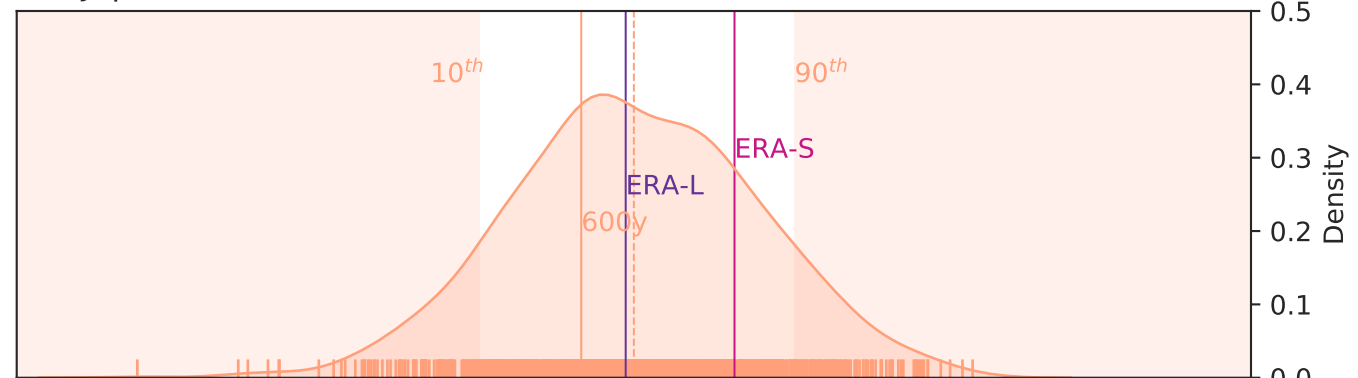

(d) NW-US Z200

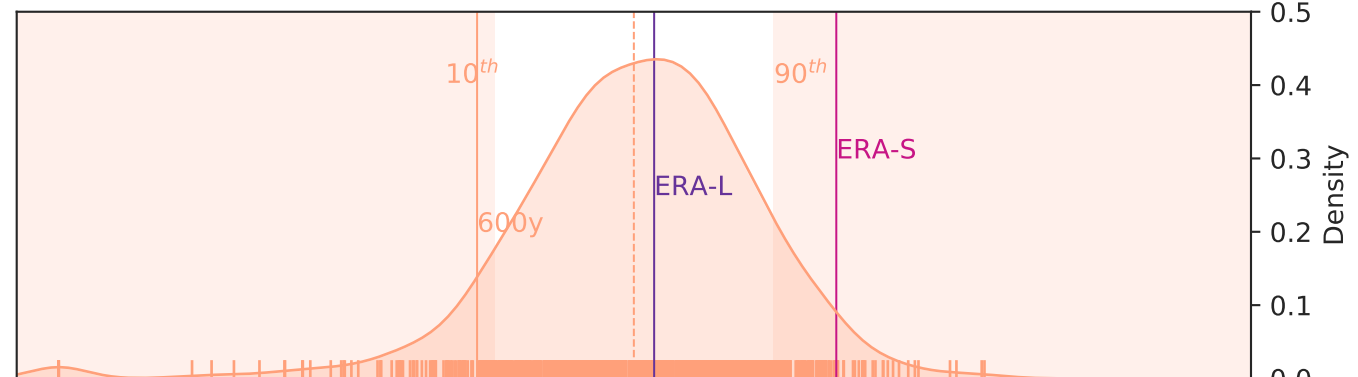

(f) M.Cont. OLR

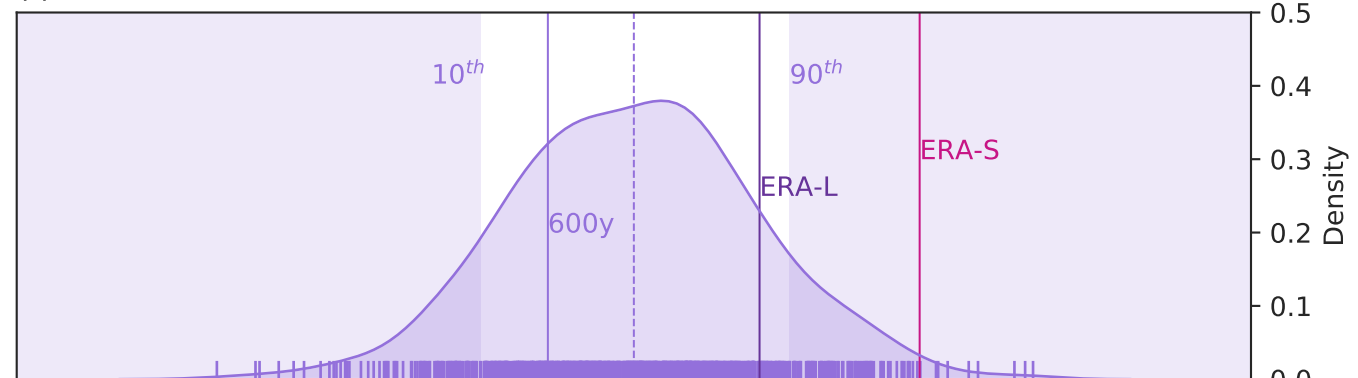

(h) CE-EU OLR

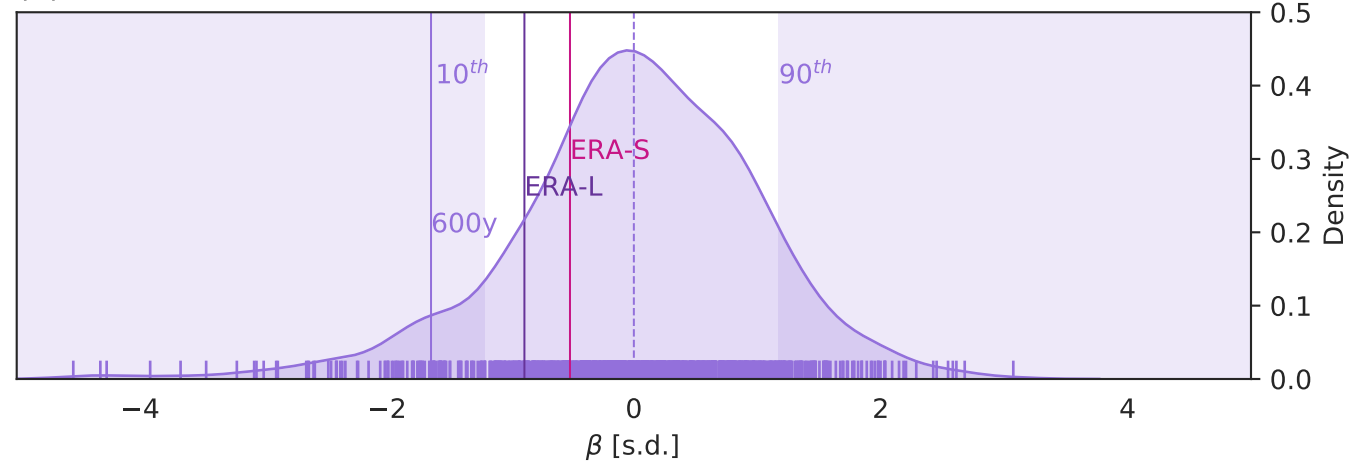



# El Niño

# La Niña

# El Niño - La Niña

(a) SAM  $\Rightarrow$  Z200 | CGT, init03 [ $\beta$ ]

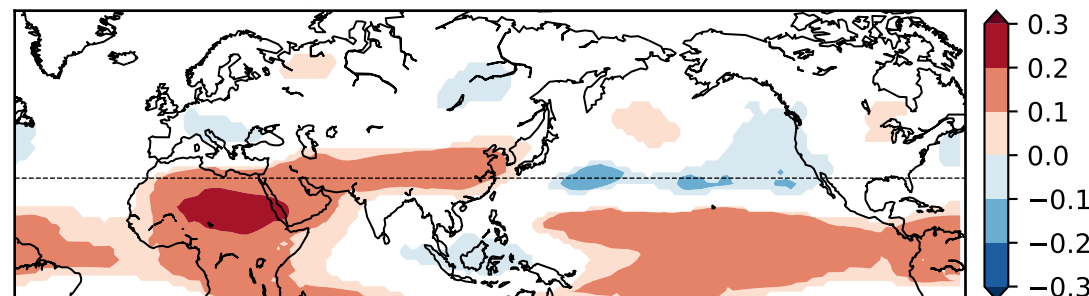

(b) SAM  $\Rightarrow$  Z200 | CGT, init03 [ $\beta$ ]

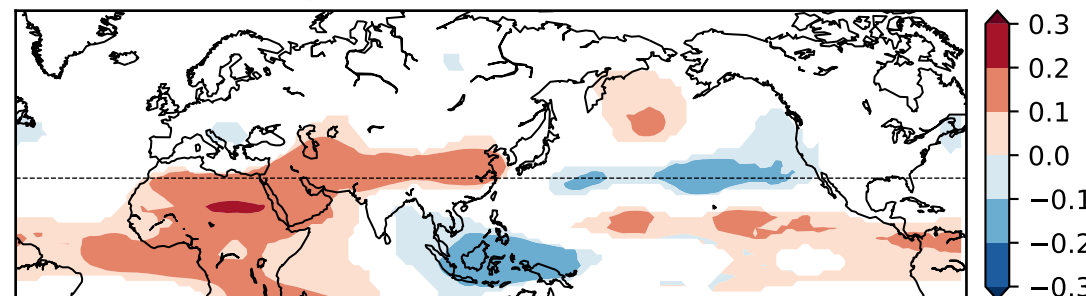

(c) SAM  $\Rightarrow$  Z200 | CGT, init03 [%]

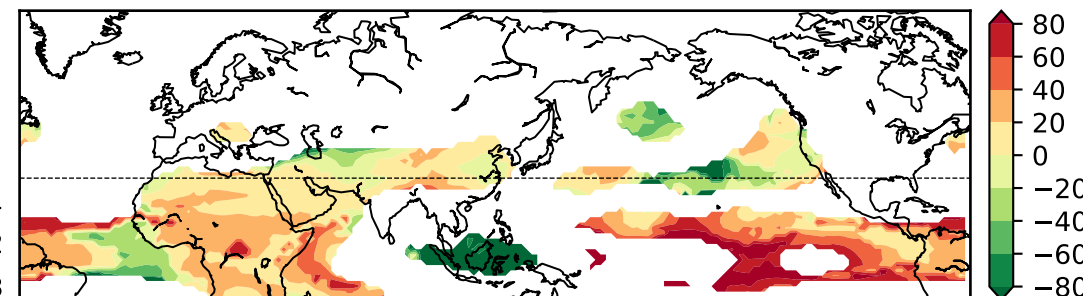

(d) SAM  $\Rightarrow$  Z200 | CGT, init05 [ $\beta$ ]

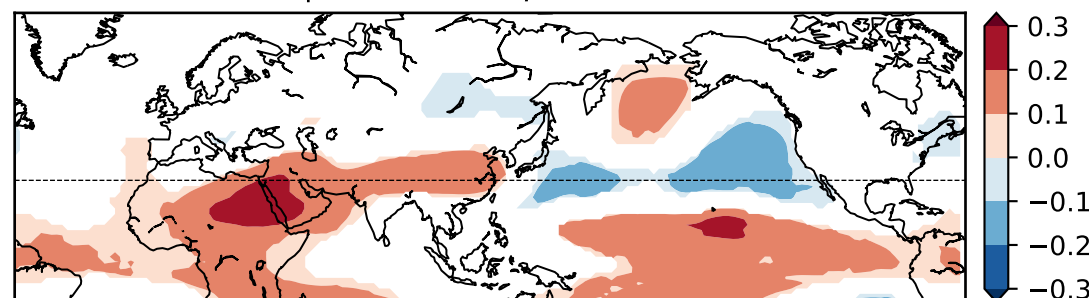

(e) SAM  $\Rightarrow$  Z200 | CGT, init05 [ $\beta$ ]

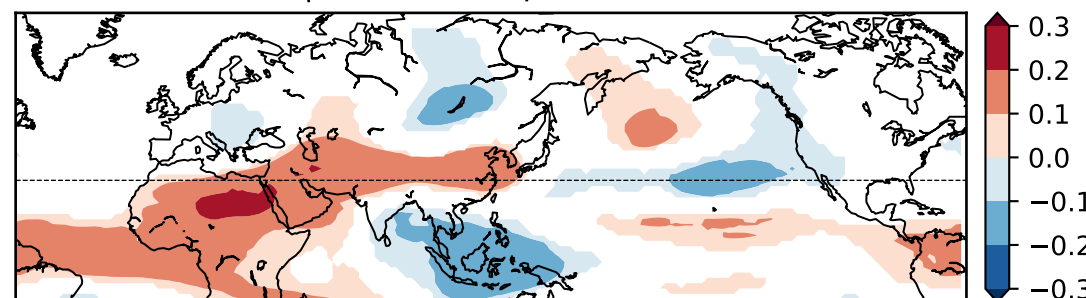

(f) SAM  $\Rightarrow$  Z200 | CGT, init05 [%]

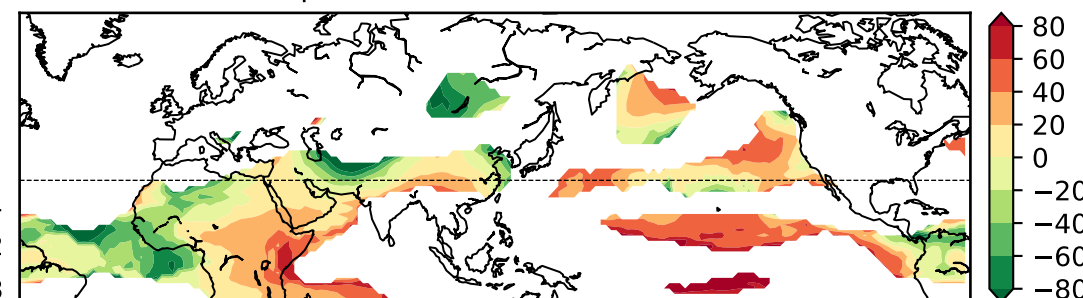

(g) CGT  $\Rightarrow$  Z200 | SAM, init03 [ $\beta$ ]

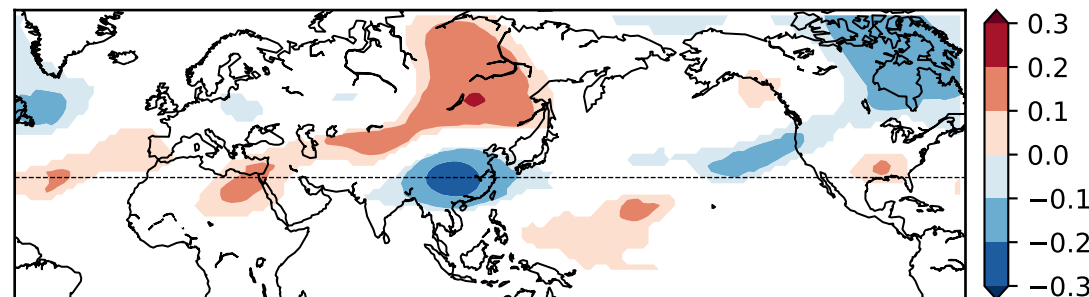

(h) CGT  $\Rightarrow$  Z200 | SAM, init03 [ $\beta$ ]

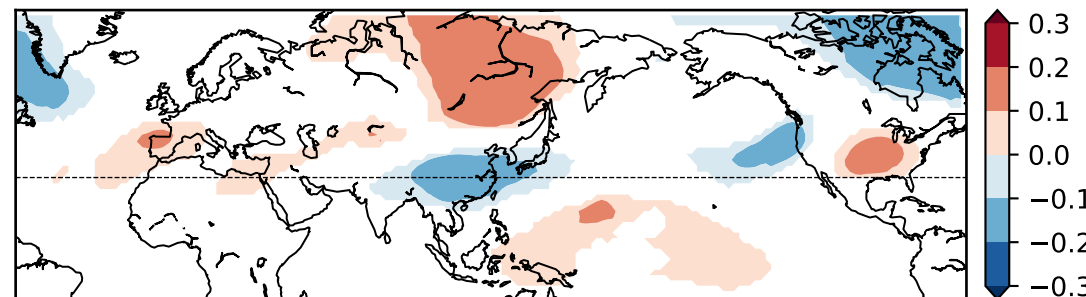

(i) CGT  $\Rightarrow$  Z200 | SAM, init03 [%]

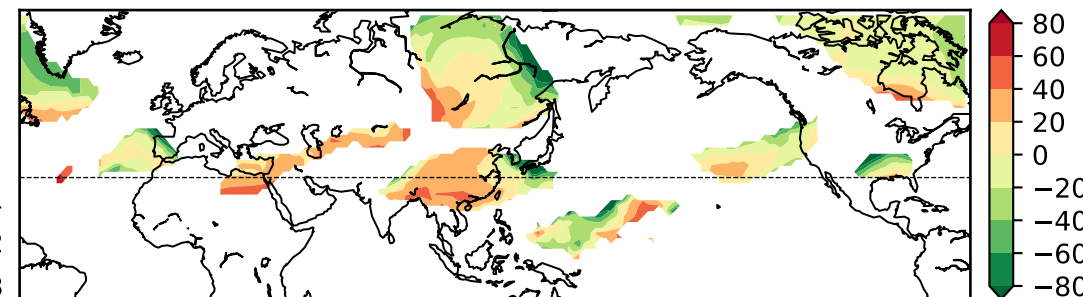

(j) CGT  $\Rightarrow$  Z200 | SAM, init05 [ $\beta$ ]

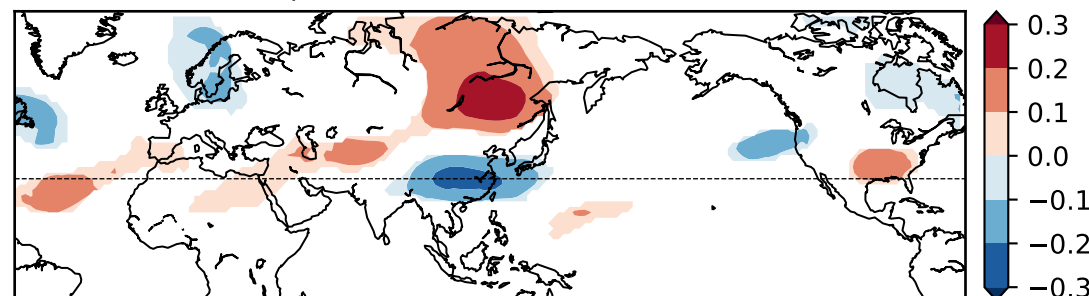

(k) CGT  $\Rightarrow$  Z200 | SAM, init05 [ $\beta$ ]

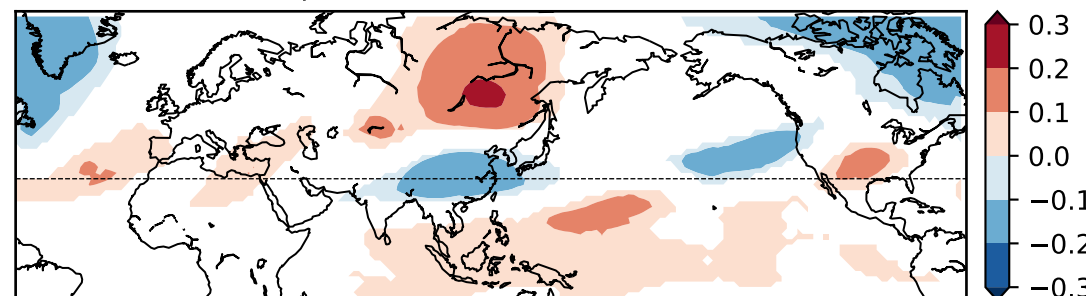

(l) CGT  $\Rightarrow$  Z200 | SAM, init05 [%]

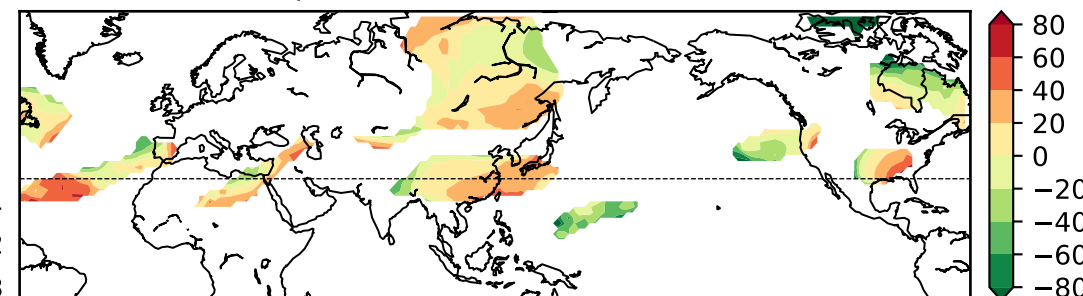

Supplement: Supplementary file [file wcd-2022-48-AC3-supplement.pdf]
