# Supplementary material for: Validation of boreal summer tropical-extratropical causal links in seasonal forecasts
Source: Copernicus journal article supplement (doi:10.5194/wcd-2022-48), 2022-08-24
Supplement: Supplementary file 1 [file wcd-2022-48-supplement.pdf]

## Supplementary Material

for

### Validation of boreal summer tropical-extratropical causal links in seasonal forecasts

Giorgia Di Capua<sup>1,2</sup>, Dim Coumou<sup>2,3,4</sup>, Bart van den Hurk<sup>3,5</sup>, Antje Weissheimer<sup>6,7</sup>, Andrew G. Turner<sup>8,9</sup> and Reik V. Donner<sup>1,2</sup>

<sup>1</sup>Department of Water, Environment, Construction and Safety, Magdeburg-Stendal University of Applied Sciences, Magdeburg, 39114, Germany

<sup>2</sup>Earth System analysis, Potsdam Institute for Climate Impact Research (PIK) – Member of the Leibniz Association, Potsdam, 14473, Germany

<sup>3</sup>Water and Climate Risk Department, Institute for Environmental Studies (IVM), VU University of Amsterdam, Amsterdam, 1081 HV, Netherlands

<sup>4</sup>Royal Netherlands Meteorological Institute (KNMI), De Bilt, 3730 AE, Netherlands

<sup>5</sup>Department of Flood Risk Management, Deltares, Delft, 2629 HV, Netherlands

<sup>6</sup>European Centre for Medium-Range Weather Forecasts, Reading, RG2 9AX, UK

<sup>7</sup>National Centre for Atmospheric Science, University of Oxford, Oxford, OX1 4BH, United Kingdom

<sup>8</sup>Department of Meteorology, University of Reading, Reading, RG6 6UR, United Kingdom

<sup>9</sup>National Centre for Atmospheric Science, University of Reading, Reading, RG6 6UR, United Kingdom

*Correspondence to:* Giorgia Di Capua ([dicapua@pik-potsdam.de](mailto:dicapua@pik-potsdam.de))

## Figures

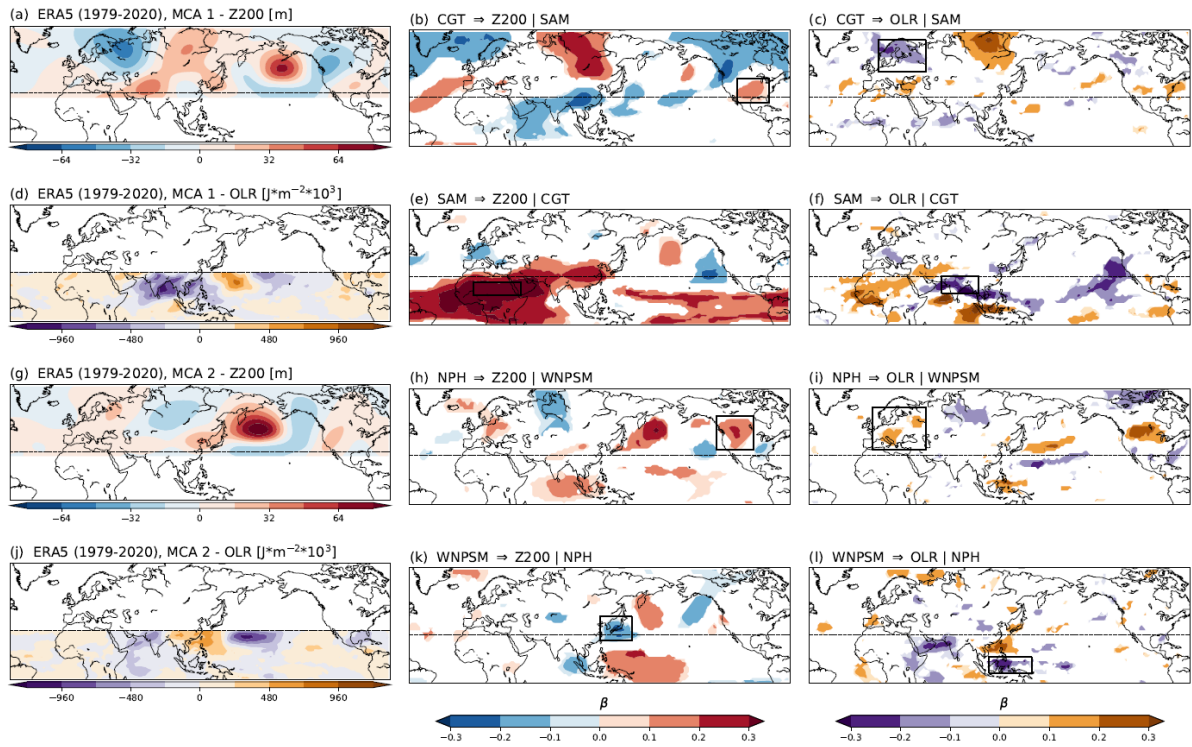

**Figure S1.** MCA modes and causal maps for ERA-long. Same as for Fig. 3 in the main text but for ERA5-long, i.e. 1979-2020.

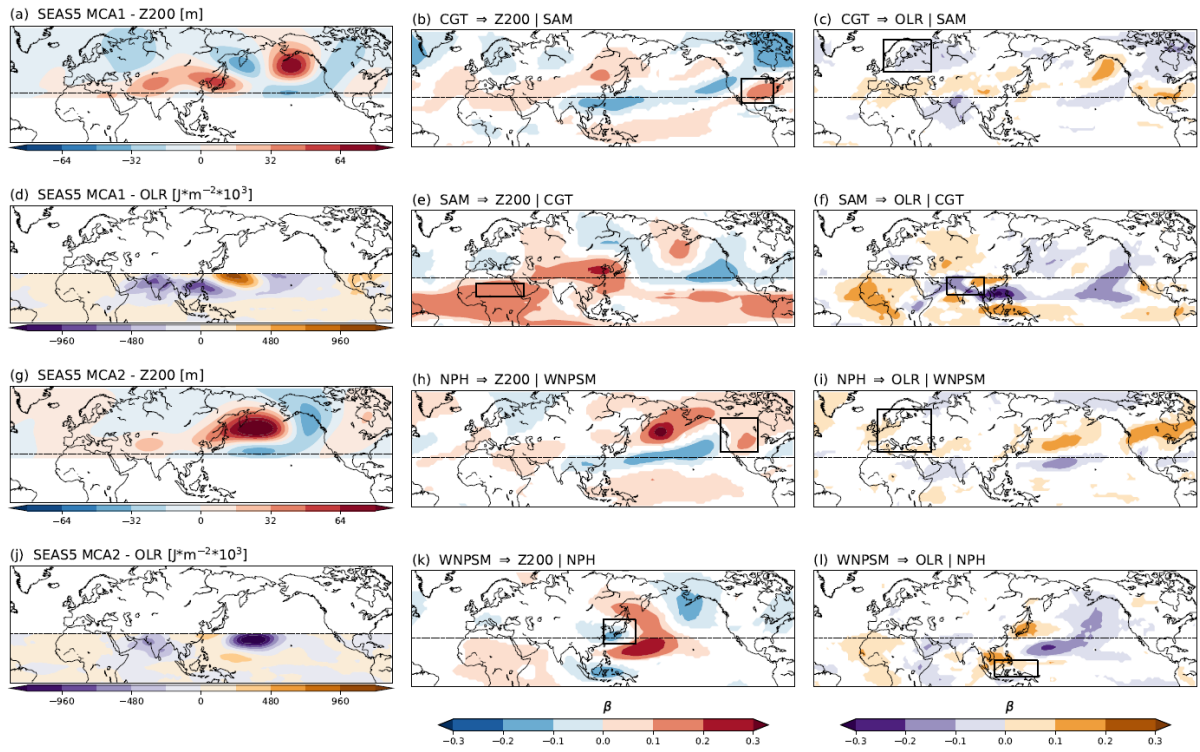

**Figure S2.** MCA modes and causal maps for SEAS5. Same as for Fig. 4 in the main text but for MCA modes obtained by running directly the MCA analysis on the SEAS5 dataset.

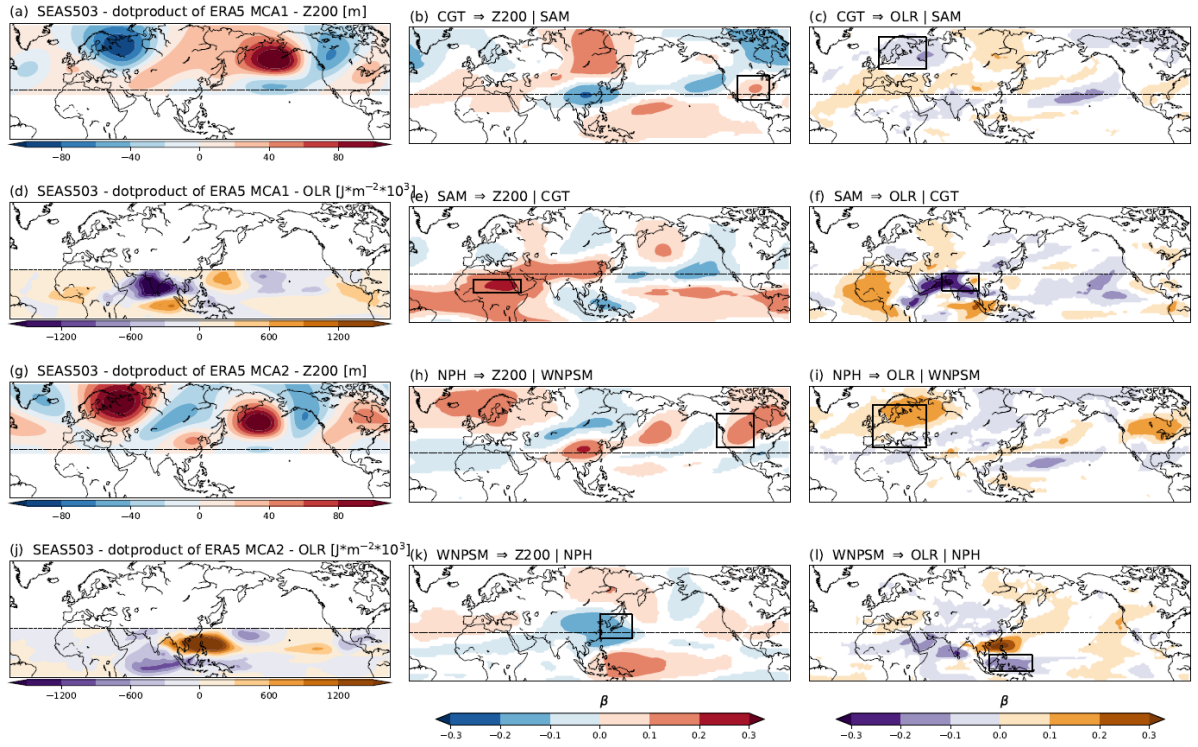

**Figure S3.** MCA modes and causal maps for SEAS5-ERA. Same as for Fig. 4 in the main text but for MCA modes obtained with SEAS5 dataset initialized on the 1<sup>st</sup> of March.

(a) CGT  $\Rightarrow$  Z200 | SAM; mean: 0.4, std: 0.37

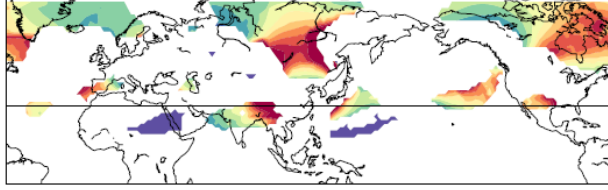

(c) SAM  $\Rightarrow$  Z200 | CGT; mean: 0.56, std: 0.28

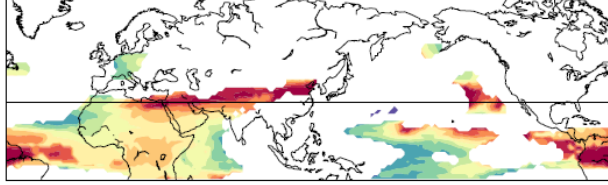

(e) CGT  $\Rightarrow$  OLR | SAM; mean: 0.37, std: 0.27

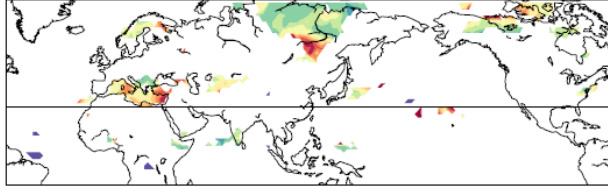

(g) SAM  $\Rightarrow$  OLR | CGT; mean: 0.75, std: 0.38

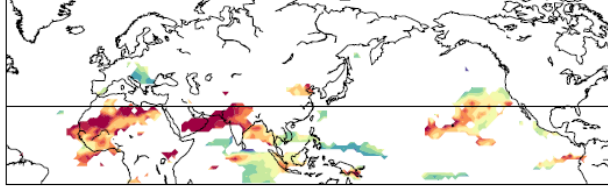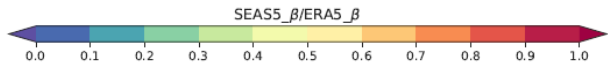

(b) CGT  $\Rightarrow$  Z200 | SAM - Histogram

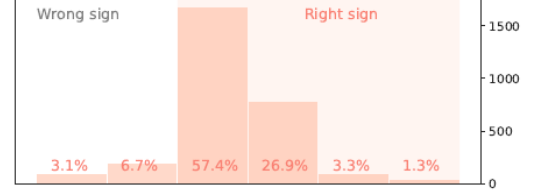

(d) SAM  $\Rightarrow$  Z200 | CGT - Histogram

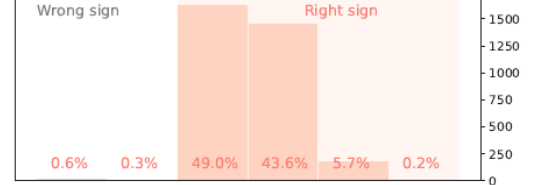

(f) CGT  $\Rightarrow$  OLR | SAM - Histogram

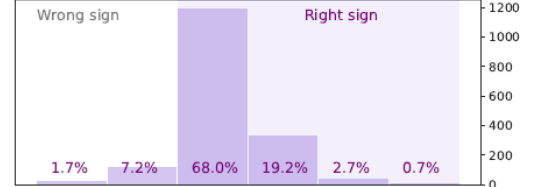

(h) SAM  $\Rightarrow$  OLR | CGT - Histogram

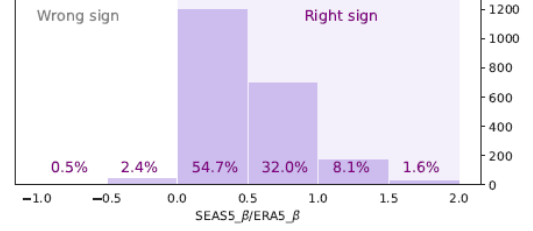

**Figure S4.** Same as for Fig. 5 in the main text but obtained with SEAS5 dataset initialized on the 1<sup>st</sup> of March.

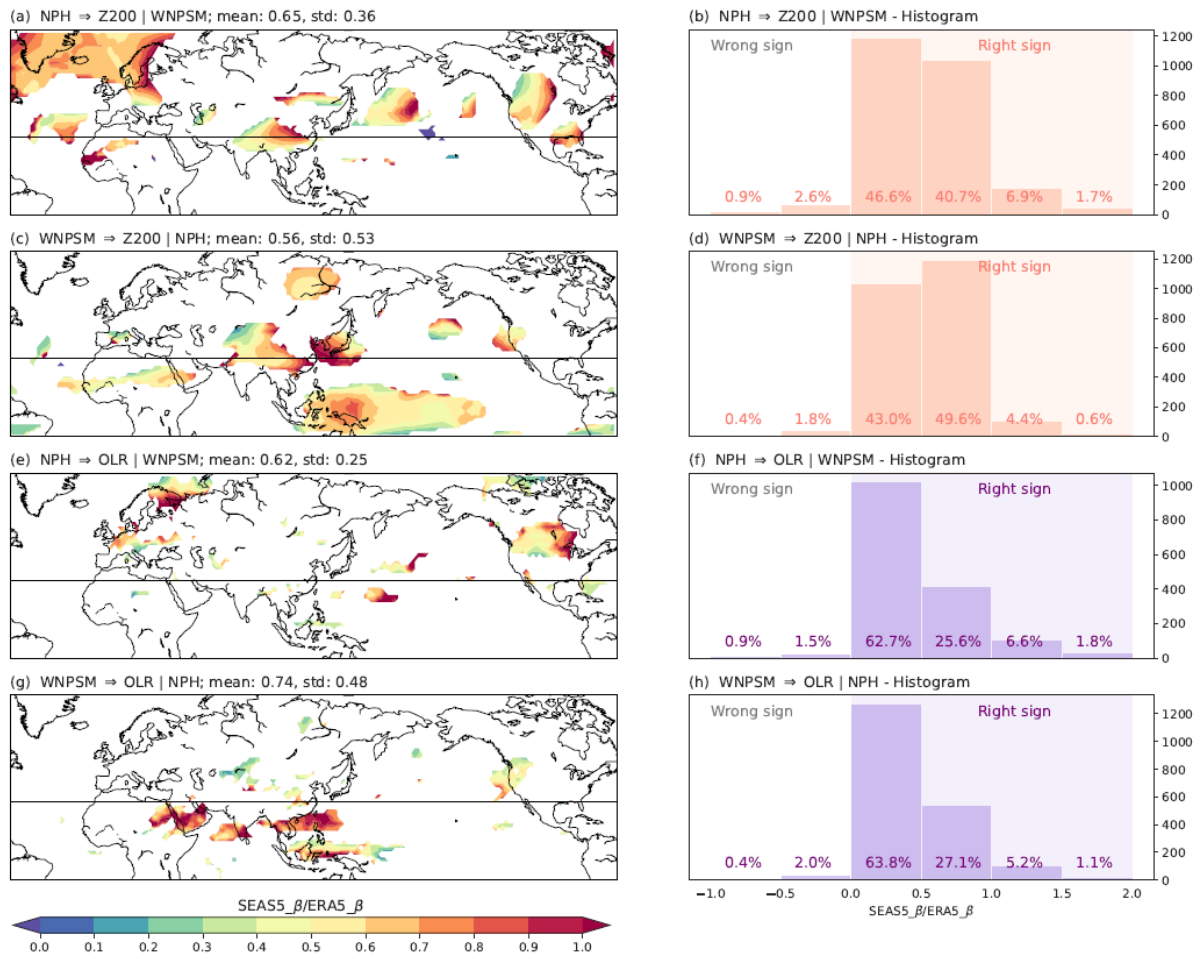

60 **Figure S5.** Same as for Fig. 6 in the main text but obtained with SEAS5 dataset initialized on the 1<sup>st</sup> of March.

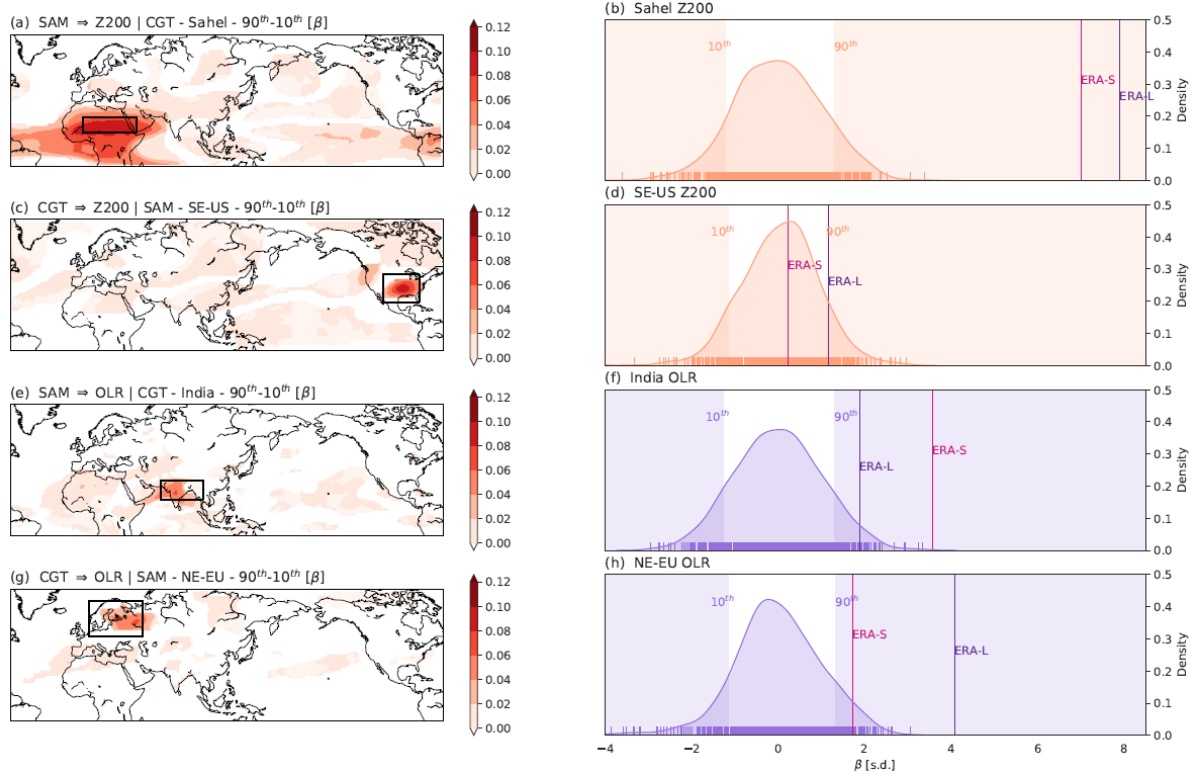

**Figure S6.** Same as for Fig. 7 in the main text but obtained with SEAS5 dataset initialized on the 1<sup>st</sup> of March.



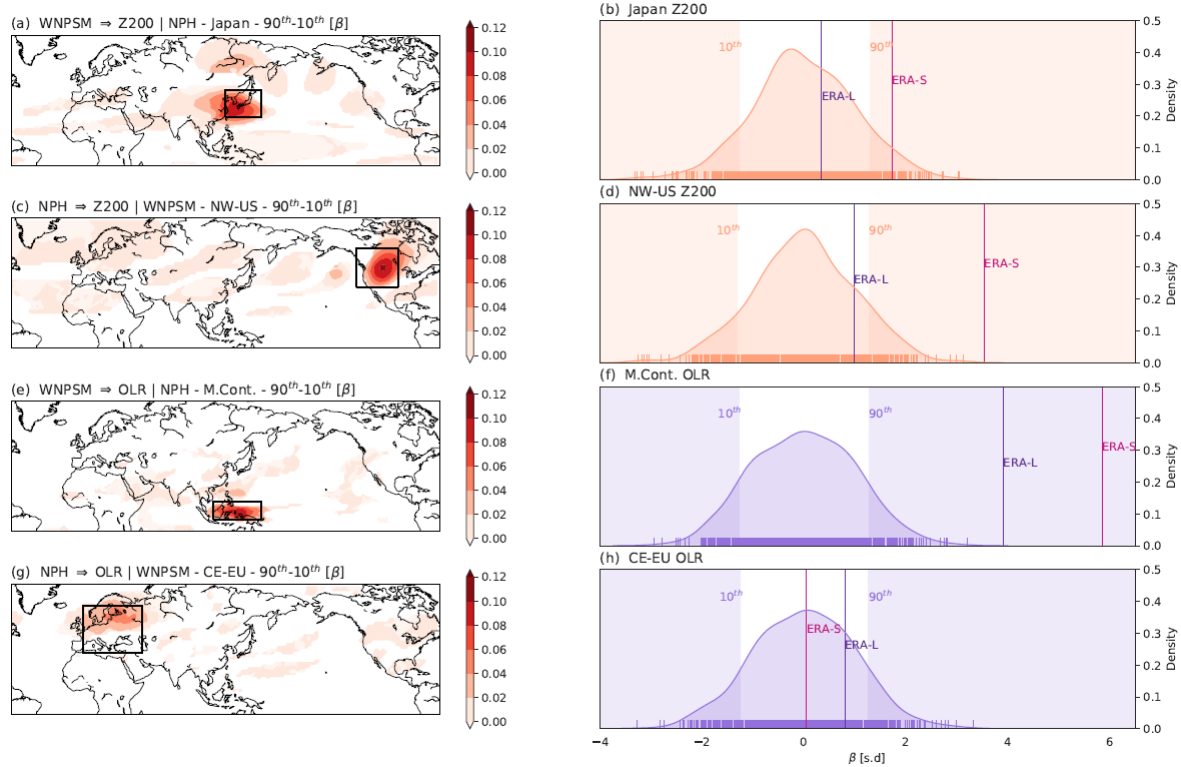

**Figure S7.** Same as for Fig. 8 in the main text but obtained with SEAS5 dataset initialized on the 1<sup>st</sup> of March.



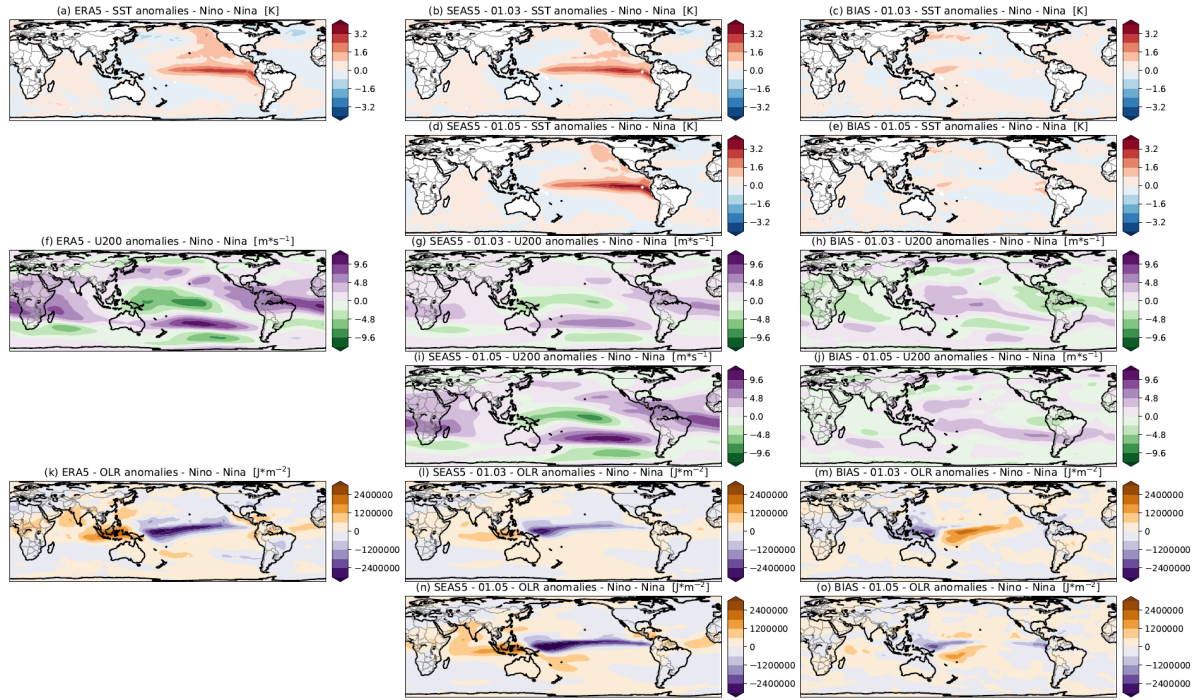

**Figure S8.** Panel (a) shows SST anomalies for El Niño – La Niña years for ERA-S. Panels (b) shows SST anomalies for El Niño – La Niña years for SEAS5 initialized on the 1<sup>st</sup> of March. Panel (c) show the BIAS between ERA-S and SEAS5 for SST fields. Panels (d) and (e) same as for Panels (b) and (c) but for SEAS5 initialized on the 1<sup>st</sup> of May. Panels (f)-(j) same as for panels (a)-(e) but for U200 fields. Panels (k)-(o) same as for panels (a)-(e) but for OLR fields.

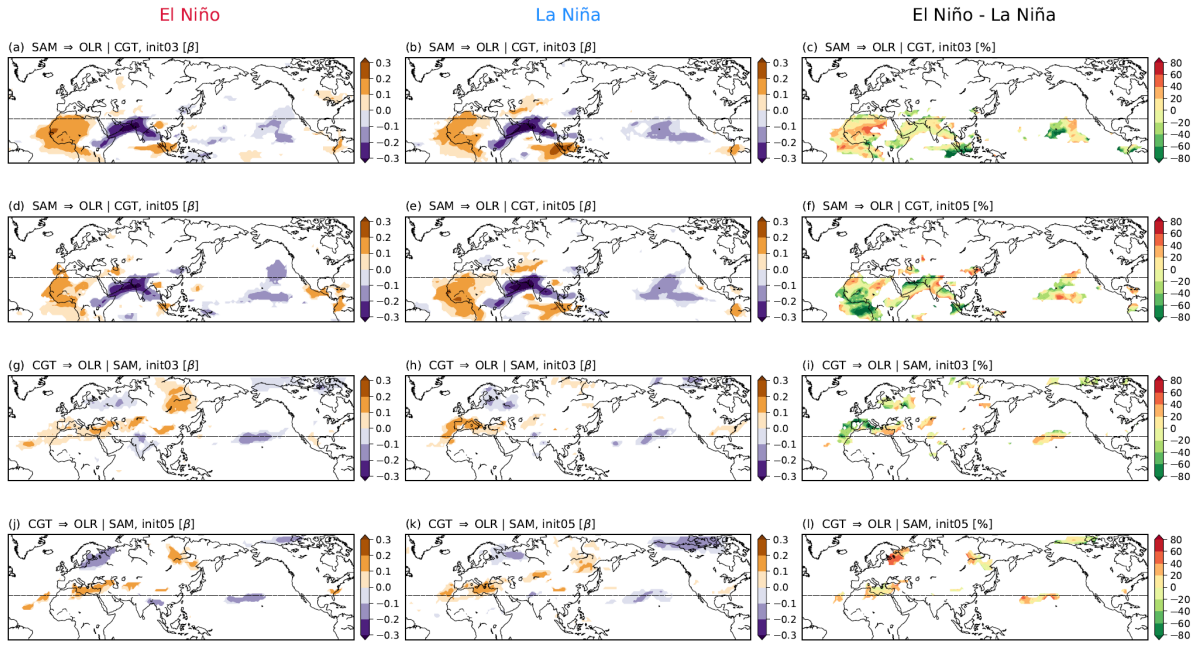

**Figure S9.** Same as for Fig. 11 but OLR fields.

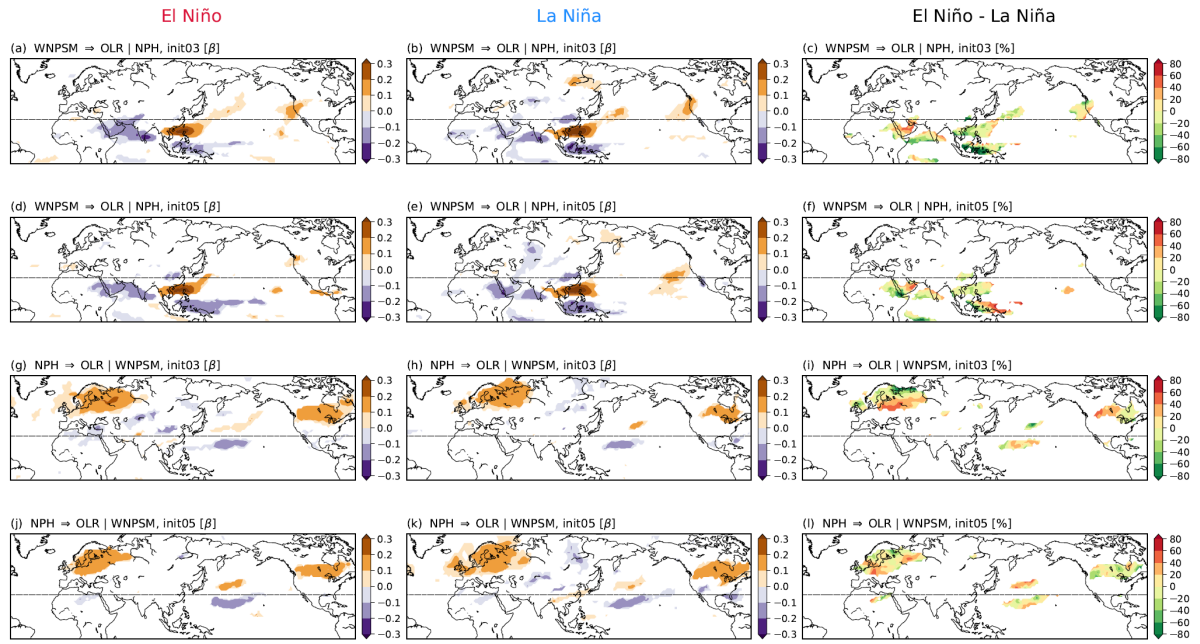

**Figure S10.** Same as for Fig. 12 but OLR fields.

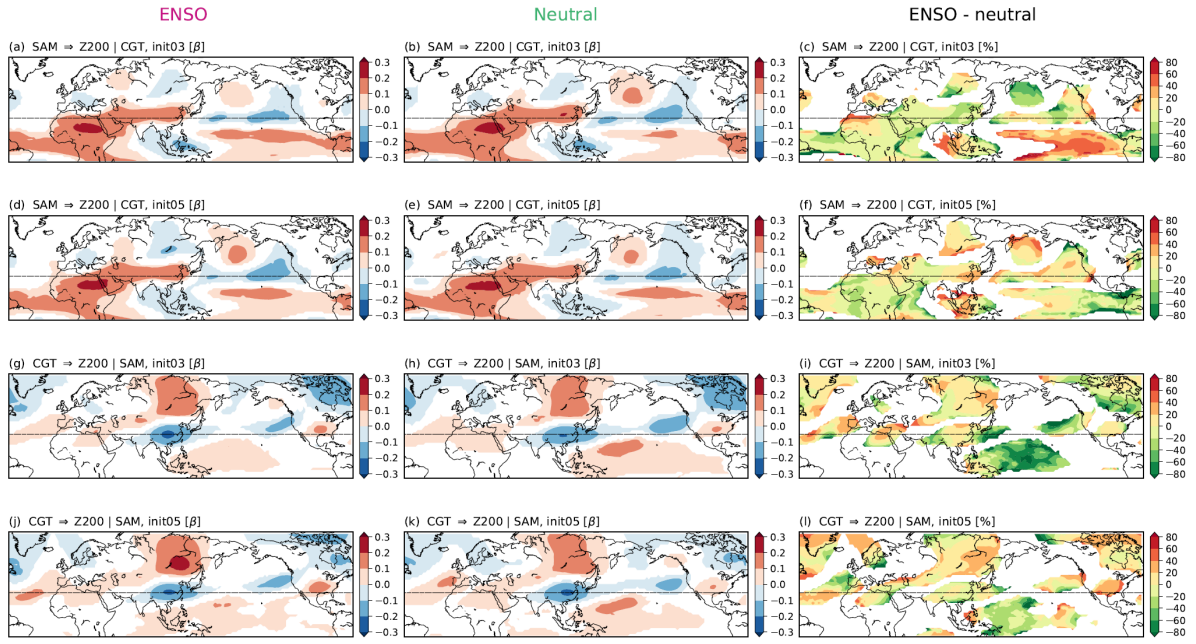

**Figure S11.** Same as for Fig. 11 but for ENSO vs neutral years.

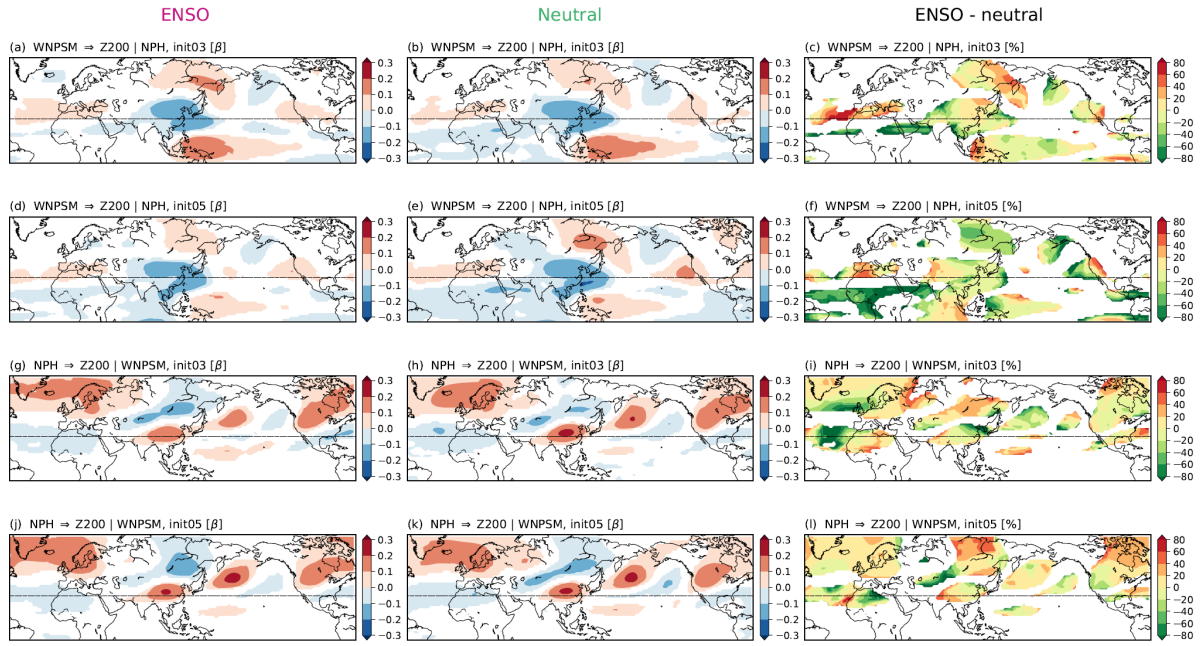

85 **Figure S12.** Same as for Fig. 12 but for ENSO vs neutral years.
